# Supplementary material for: Antimicrobial and Cytotoxic Activity of Novel Imidazolium-Based Ionic Liquids
Source: MDPI journal article supplement (doi:10.3390/molecules27061974), 2022-03-18

## ***Antimicrobial and cytotoxic activity of novel imidazolium-based ionic liquids***

Łukasz Pałkowski, Maciej Karolak, Andrzej Skrzypczak, Marta Wojcieszak, Filip Walkiewicz, Jonasz Podemski, Karol Jaroch, Barbara Bojko, Katarzyna Materna, Jerzy Krysiński

### **Supplementary material**

#### **Section S1.1. FTIR ATR spectra**

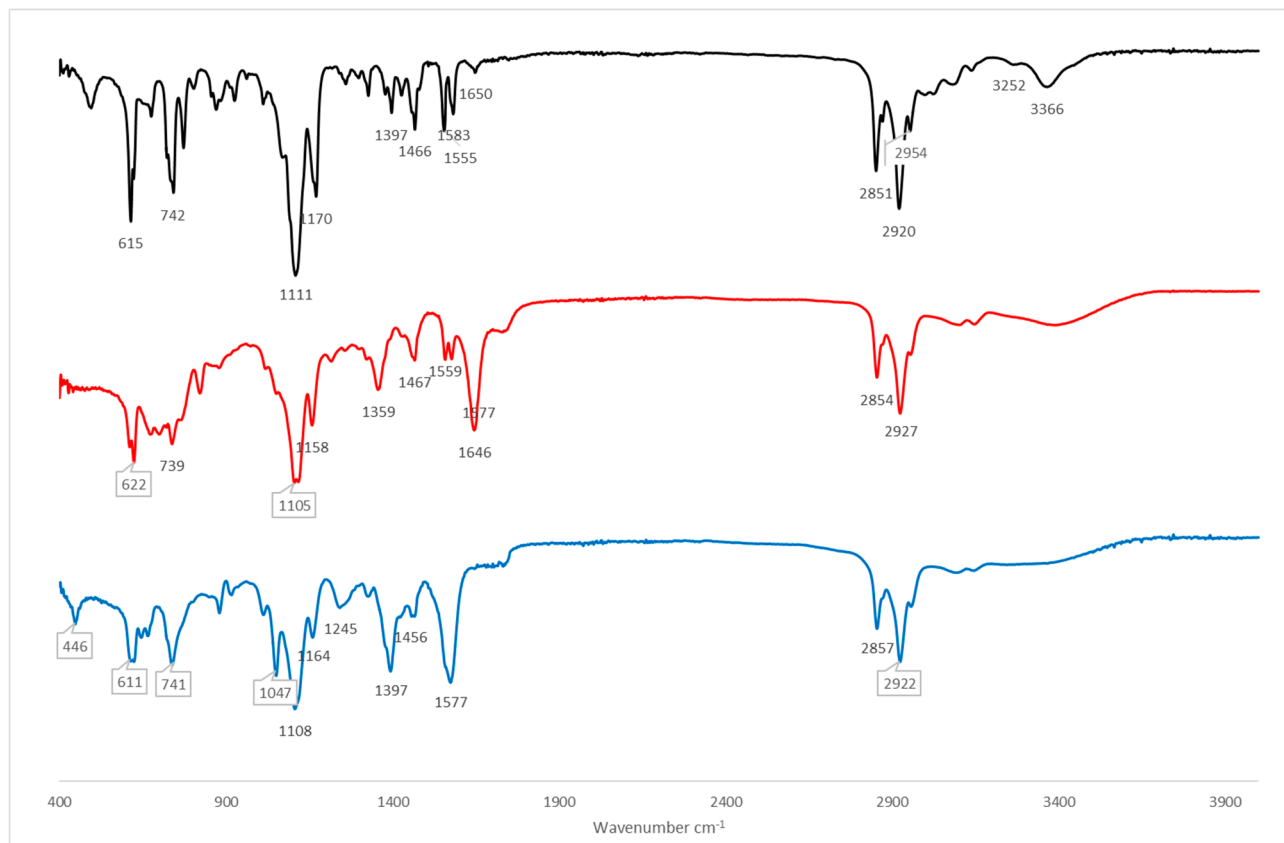

Figure S1. FTIR ATR spectra for CL-4 (black) MR-5 (red) and PR-6 (blue),

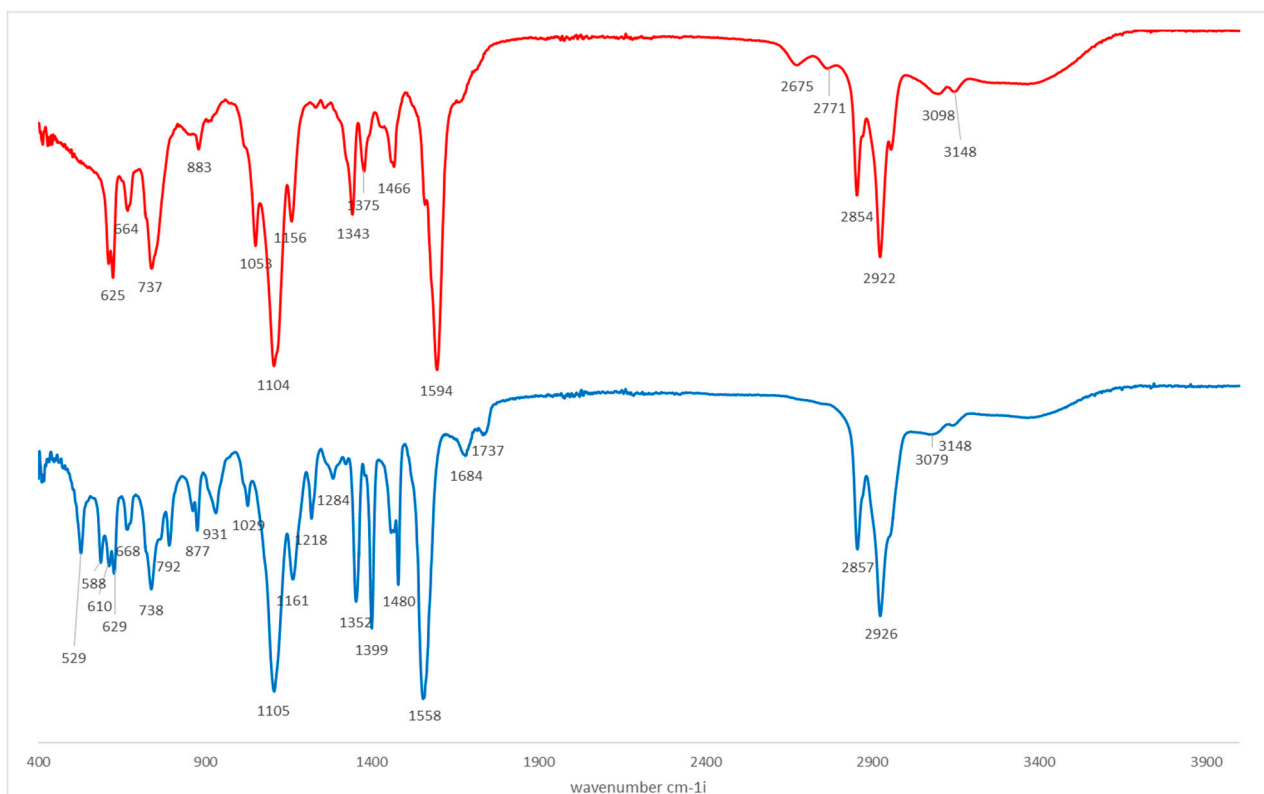

Figure S2. FTIR ATR spectra for TR-10 (red) compared with dichloroacetate (blue),

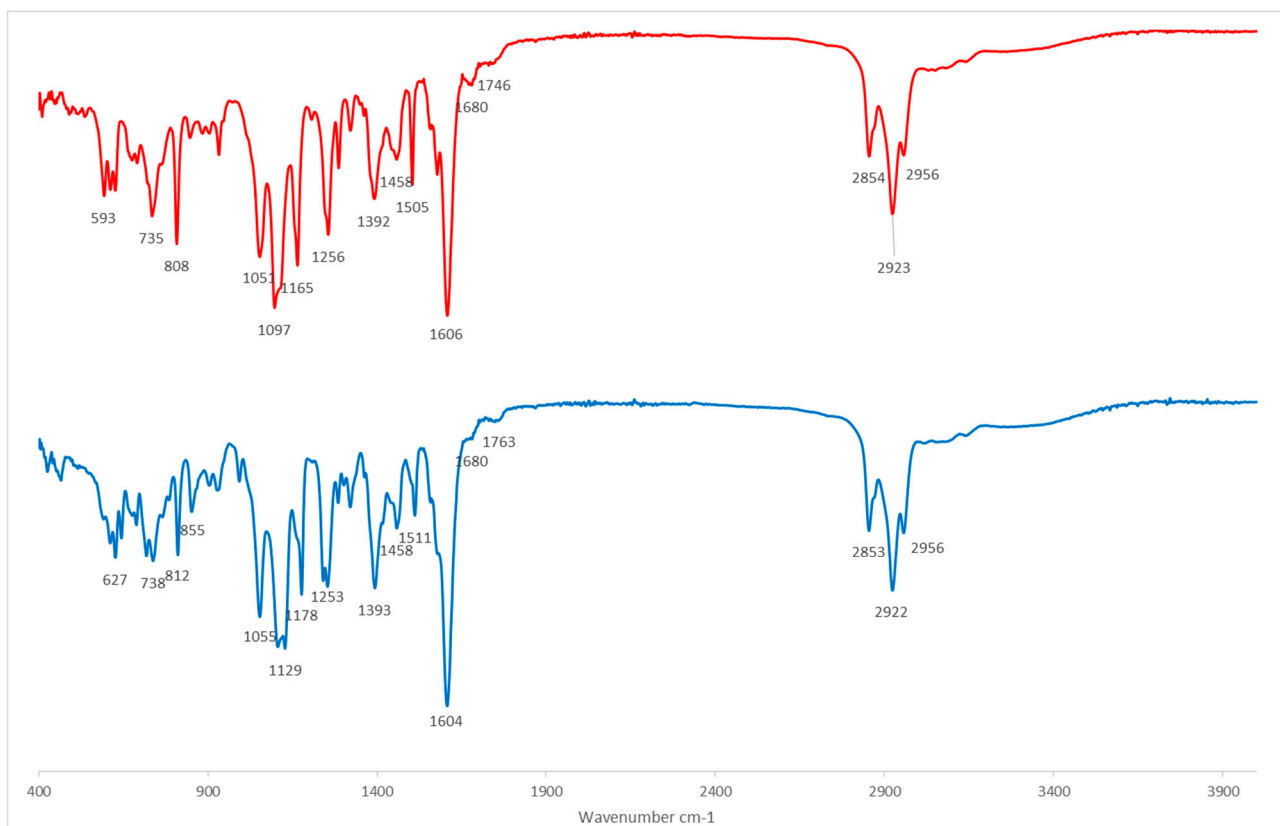

Figure S3. FTIR ATR spectra for TY-7 (red) and OR-3 (blue),

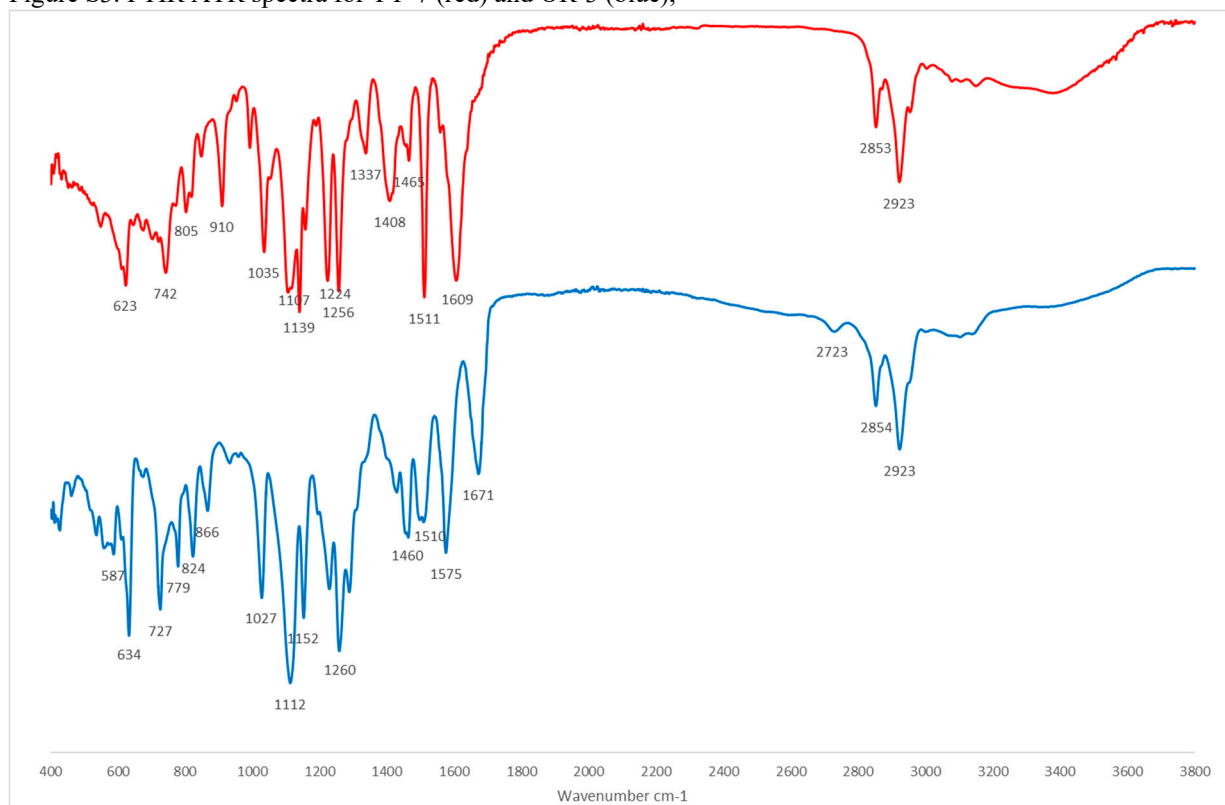

Figure S4. FTIR ATR spectra for EV-9 (red) and VA-8 (blue),

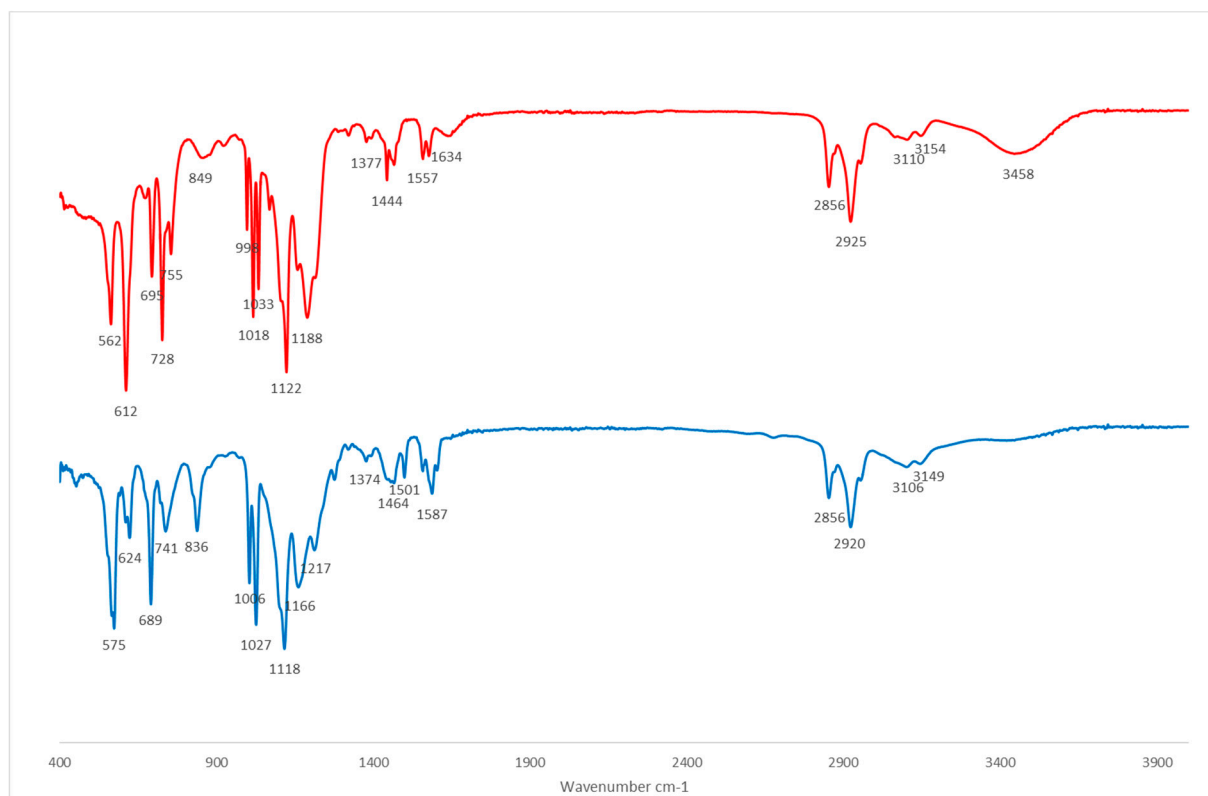

Figure S5. FTIR ATR spectra for FE-1 (red) and BE-2 (blue),

## Section S1.2. DSC data

**Table S1.** DSC data for obtained ionic liquids

| compound | T <sub>g</sub> [°C] <sup>a</sup> | T <sub>c</sub> [°C] <sup>b</sup> | T <sub>m</sub> [°C] <sup>c</sup> |
|----------|----------------------------------|----------------------------------|----------------------------------|
| FE-1     | -49.76                           | -23.61                           | 8.8                              |
| BE-2     | -29.37                           | -4.78                            | -18.90                           |
| OR-3     | -69.24                           | -50.39                           | -43.05                           |
| CL-4     | -                                | -2.02                            | 16.62                            |
| MR-5     | -54.54                           | -18.75                           | -24.98                           |
| PR-6     | -                                | -52.23                           | -37.01                           |
| TY-7     | -68.73                           | -                                | -                                |
| VA-8     | -36.92                           | -                                | -                                |
| EV-9     | -59.45                           | -49.36                           | -37.26                           |
| TR-10    | -                                | -68.65                           | -61.58                           |

T<sub>m</sub> – melting point; T<sub>c</sub> – temperature of crystallization; T<sub>g</sub> – glass transition temperature

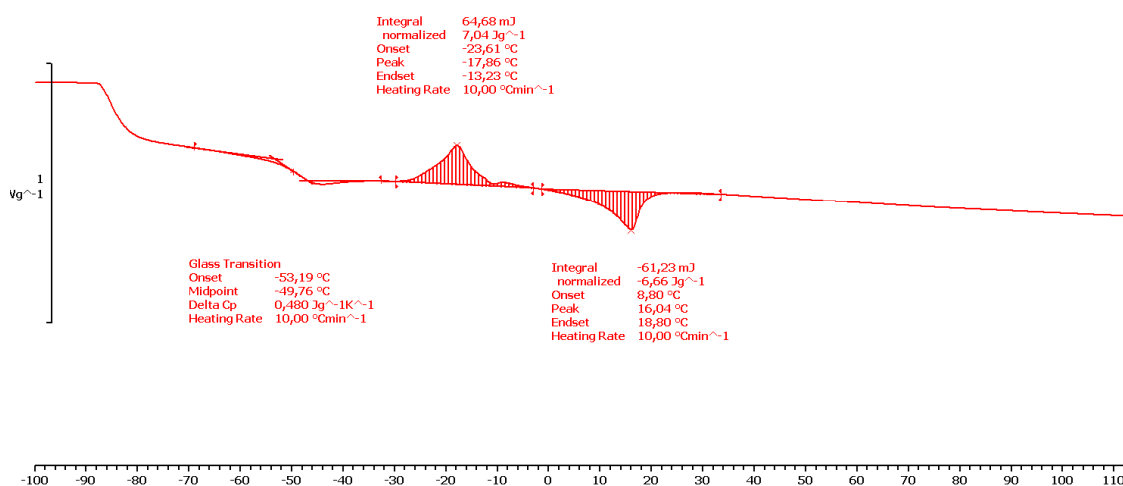

DSC curve for FE-1

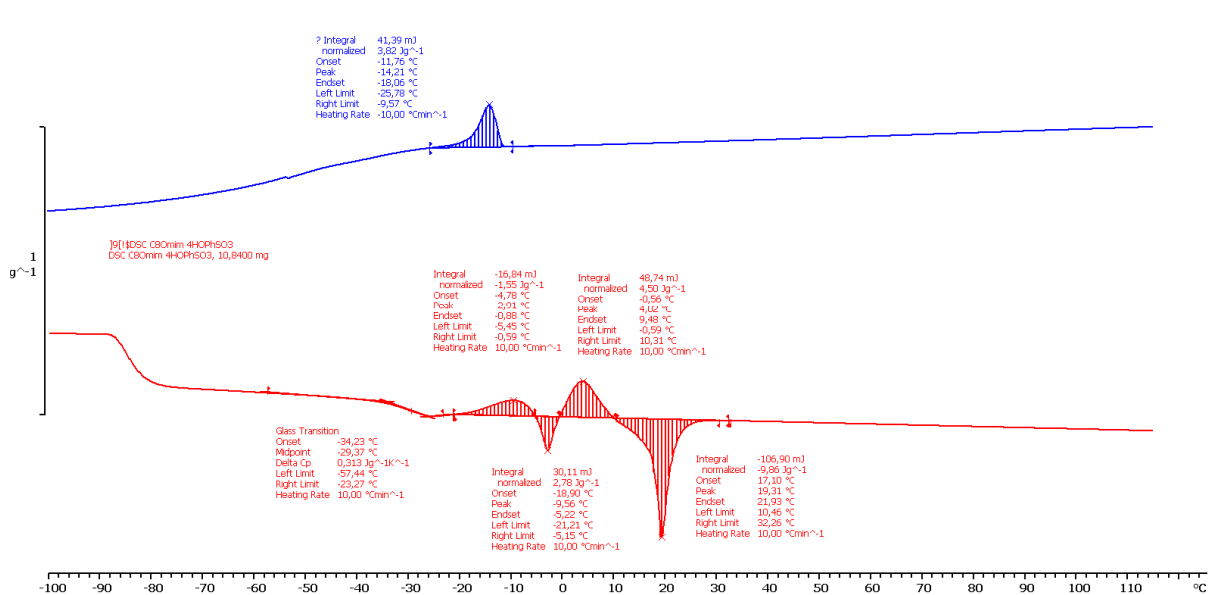



DSC curve for BE-2

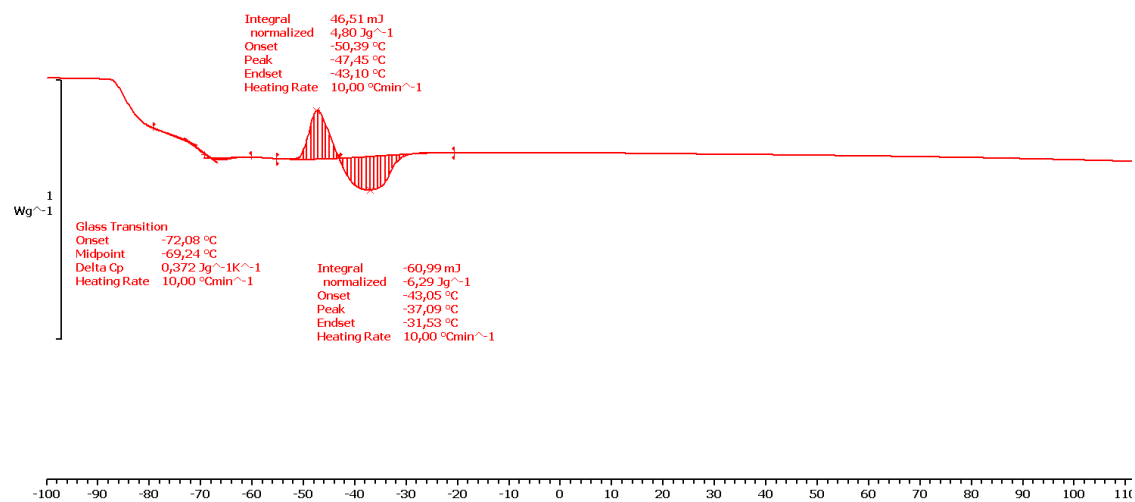

DSC curve for OR-3

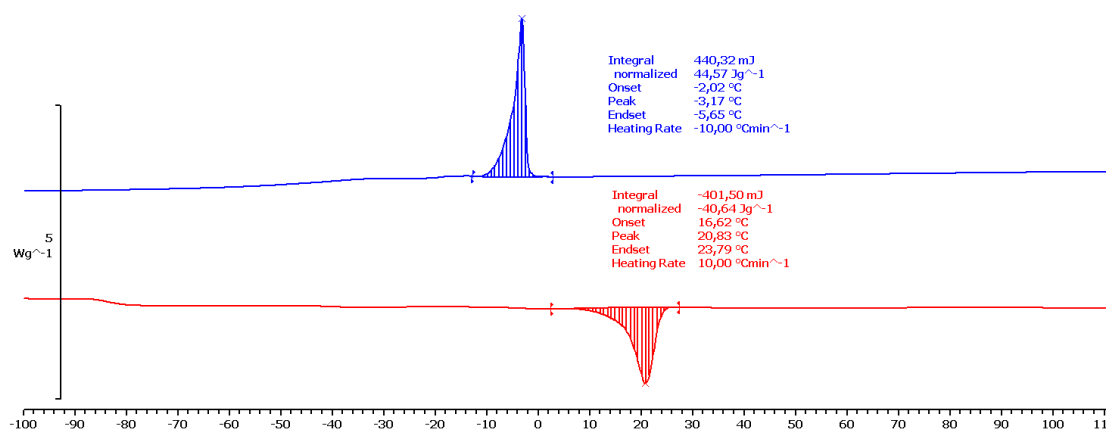

DSC curve for CL-4

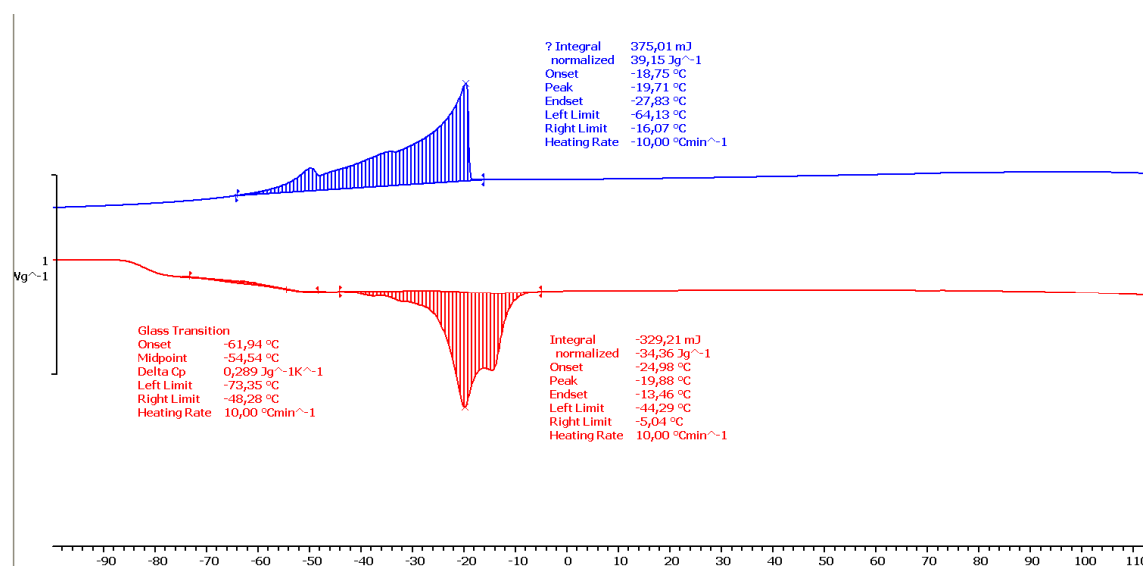

DSC curve for MR-5

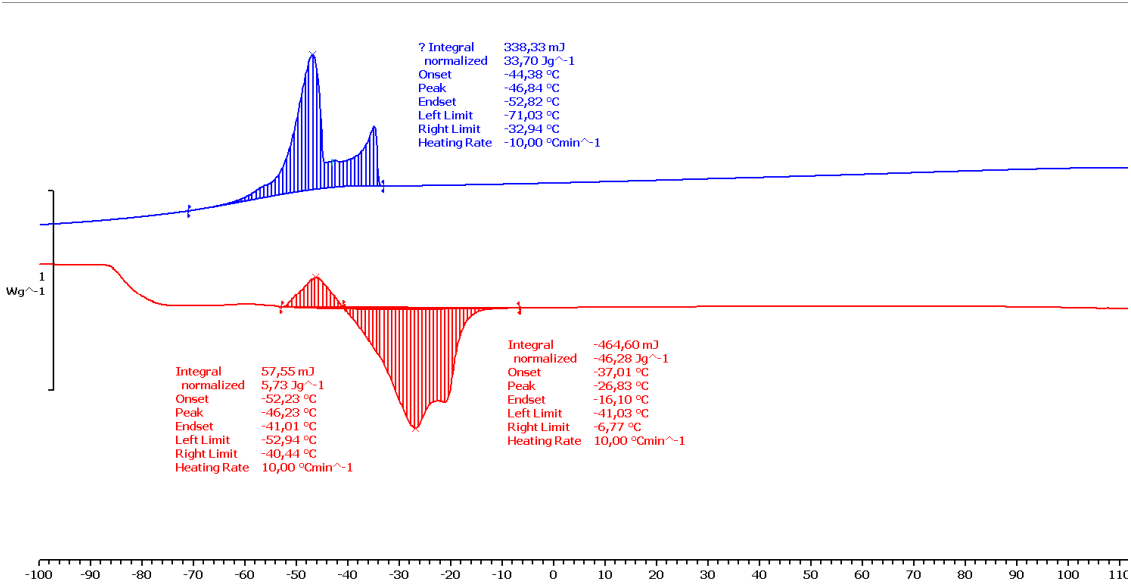

DSC curve for PR-6

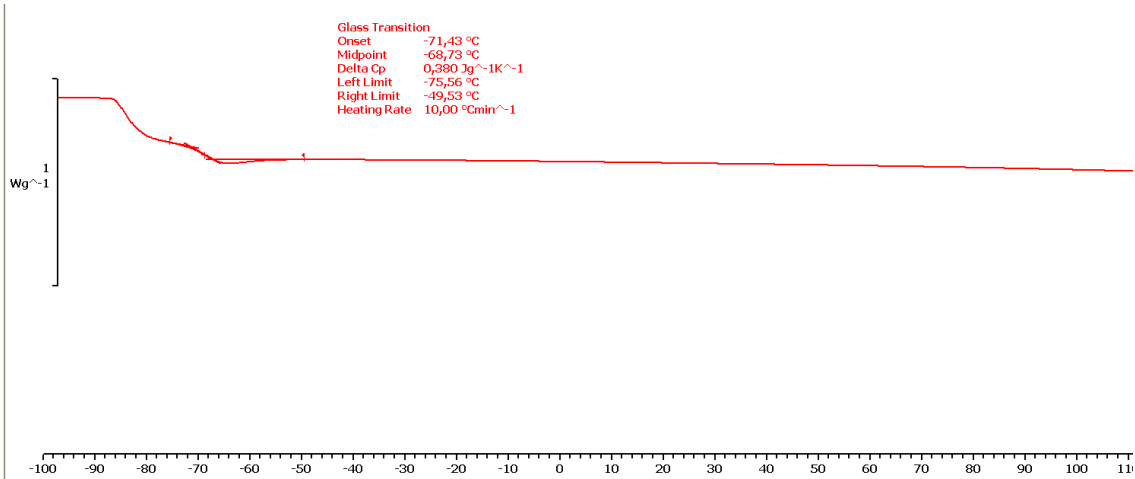

DSC curve for TY-7

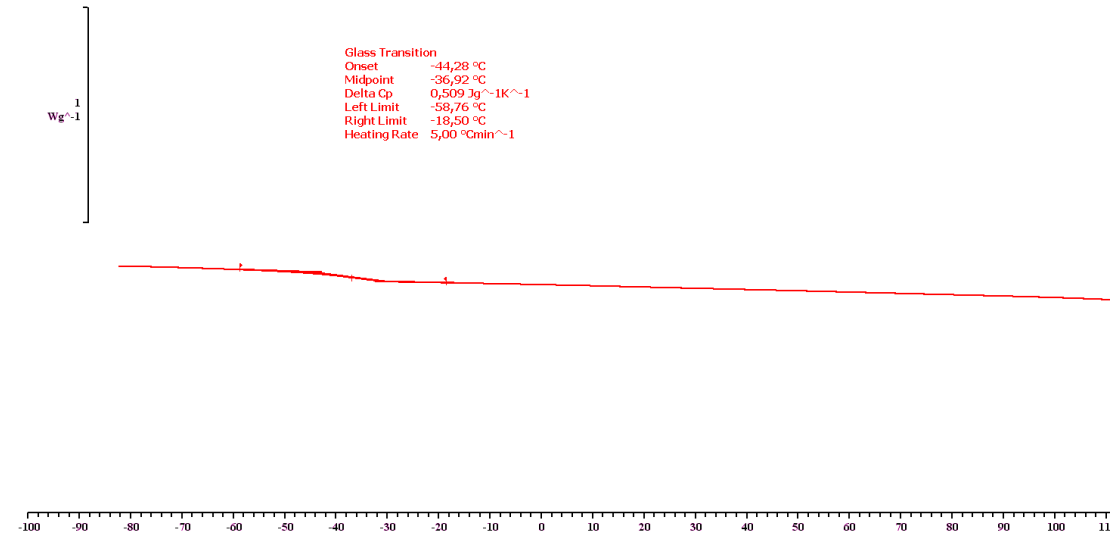

DSC curve for VA-8

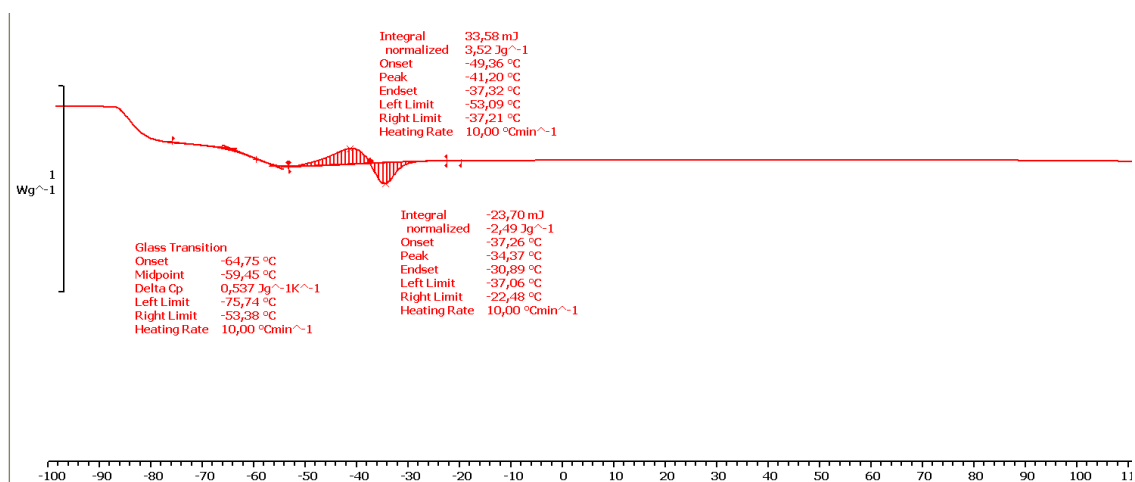

DSC curve for EV-9

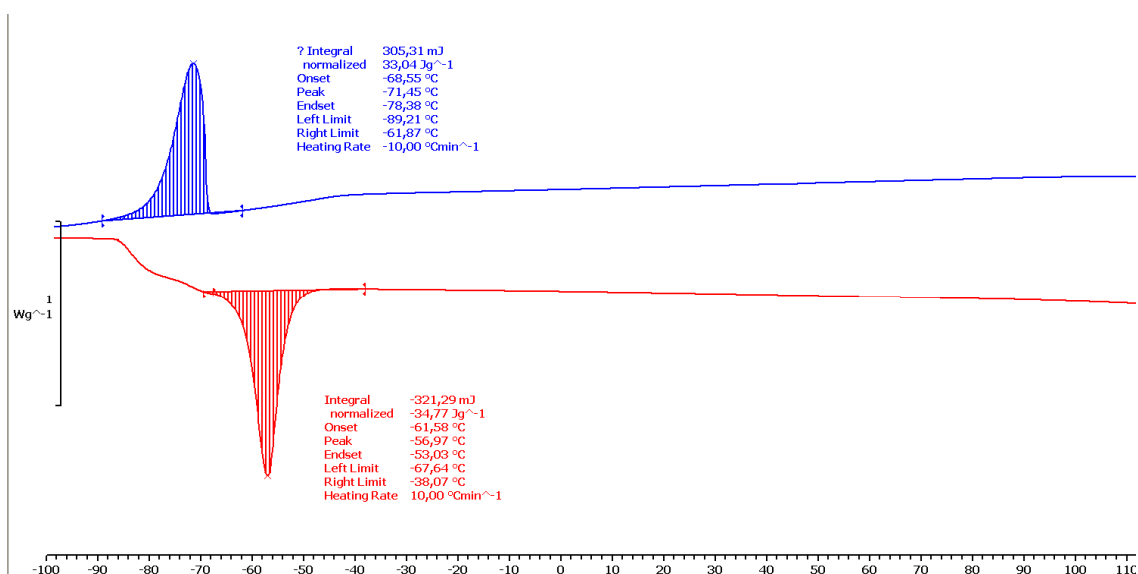

DSC curve for TR-10

### Section S1.3. Thermal stability and TGA curves

Table S2. Thermal stability for obtained ionic liquids

| compound | T <sub>i</sub> [°C] | T <sub>0.01</sub> [°C] | T <sub>0.02</sub> [°C] | T <sub>0.05</sub> [°C] |
|----------|---------------------|------------------------|------------------------|------------------------|
| FE-1     | 138.65              | 159.92                 | 170.90                 | 192.18                 |
| BE-2     | 135.62              | 163.71                 | 176.93                 | 196.93                 |
| OR-3     | 115.98              | 130.23                 | 139.40                 | 156.37                 |
| CL-4     | 117.60              | 147.81                 | 159.69                 | 177.68                 |
| MR-5     | 97.48               | 107.77                 | 116.00                 | 129.73                 |
| PR-6     | 85.81               | 97.92                  | 106.05                 | 120.46                 |
| TY-7     | 114.24              | 133.92                 | 144.79                 | 162.77                 |
| VA-8     | 112.85              | 135.25                 | 144.08                 | 157.66                 |
| EV-9     | 118.62              | 135.59                 | 145.78                 | 163.09                 |
| TR-10    | 102.67              | 114.21                 | 122.36                 | 134.91                 |

T<sub>i</sub> initial decomposition -temperature at which dm/dt obtained value 10<sup>-4</sup> mg/s

T<sub>0.01</sub> – decomposition temperature of 1% sample;

T<sub>0.02</sub> – decomposition temperature of 50% sample

T<sub>0.05</sub> – decomposition temperature of 50% sample

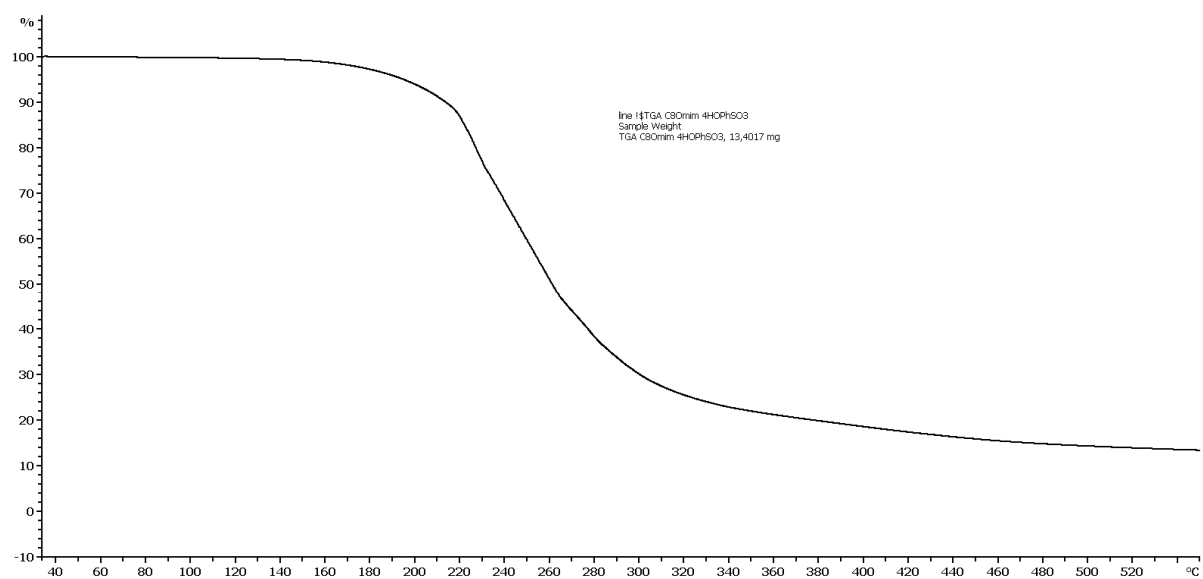

TGA curve for compound FE-1

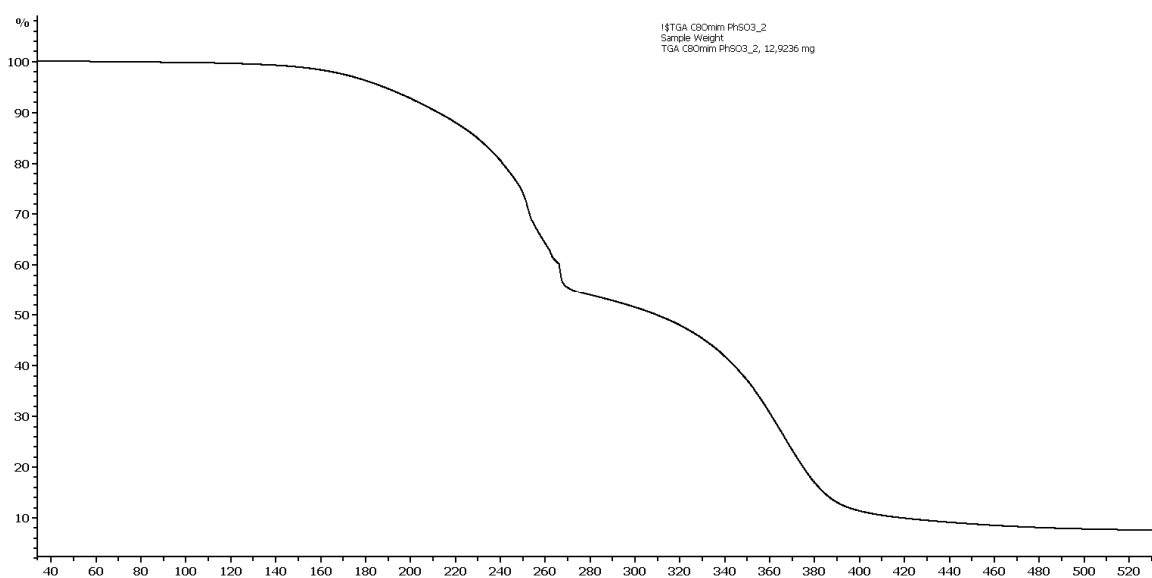

TGA curve for compound BE-2

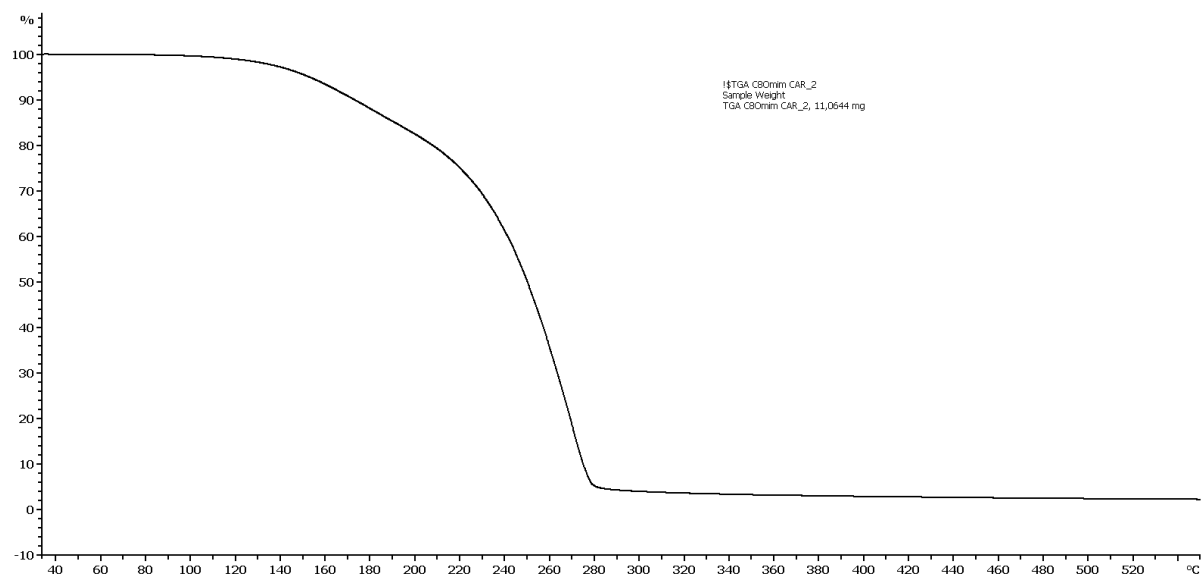

TGA curve for compound OR-3

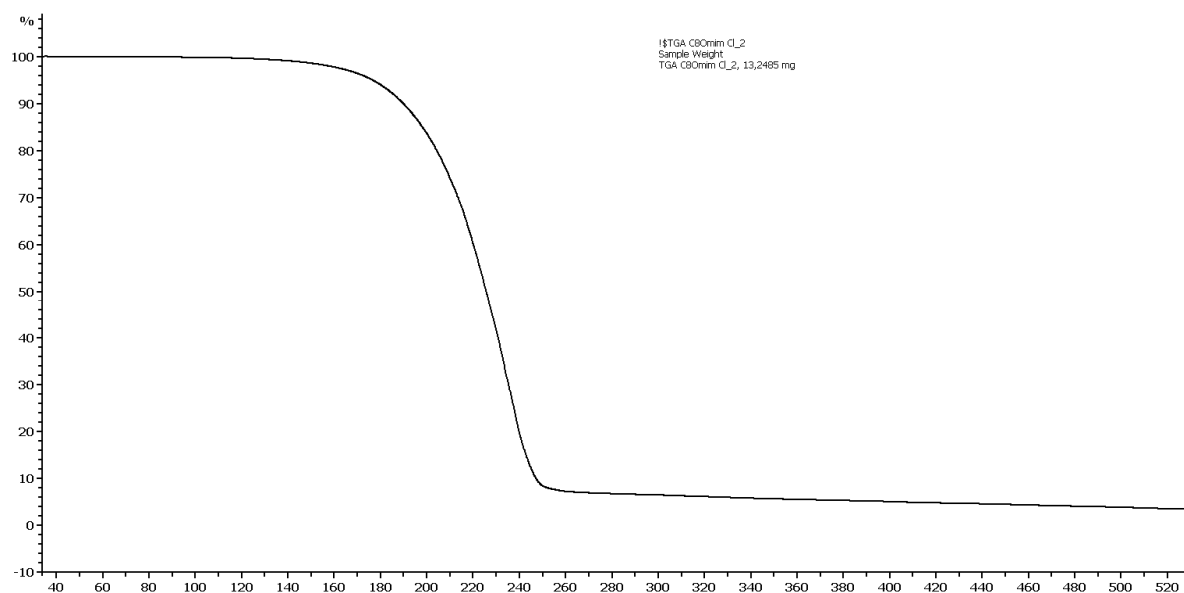

TGA curve for compound CL-4

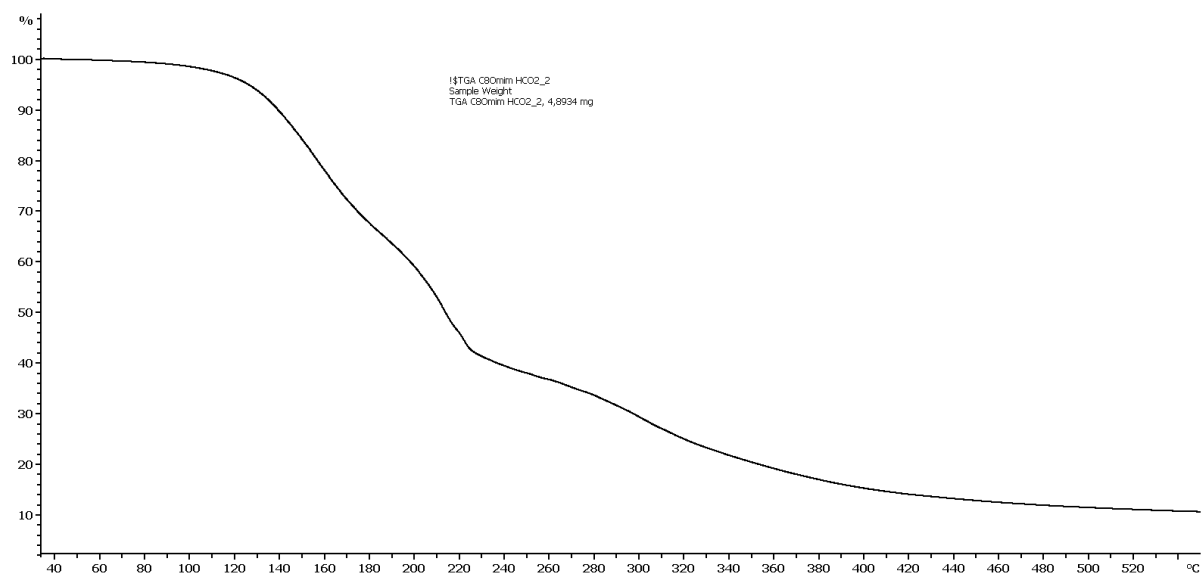

TGA curve for compound MR-5

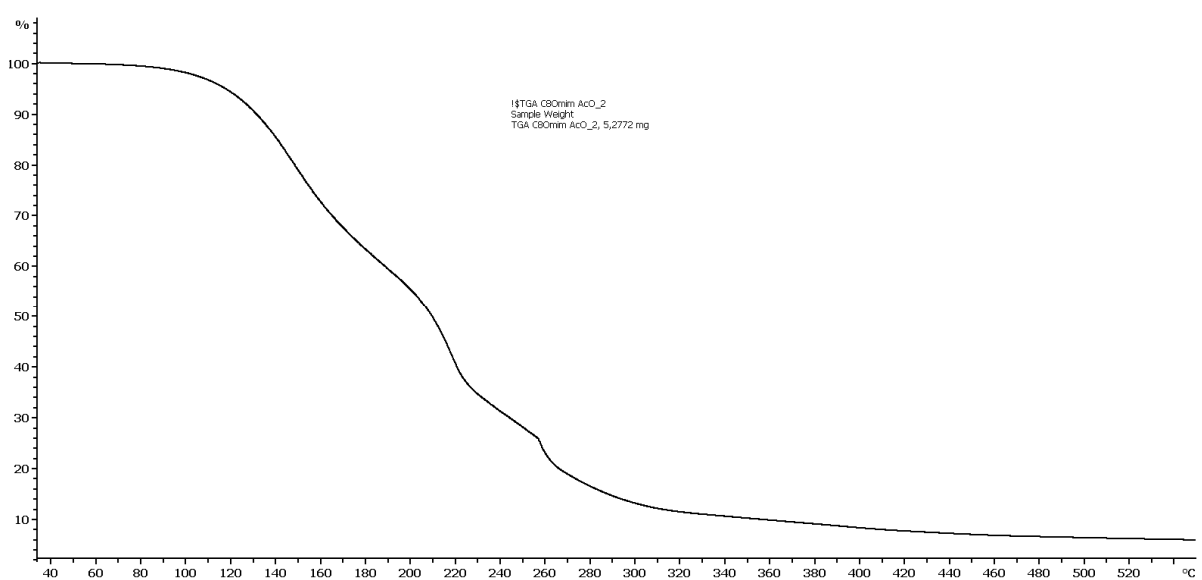

TGA curve for compound PR-6

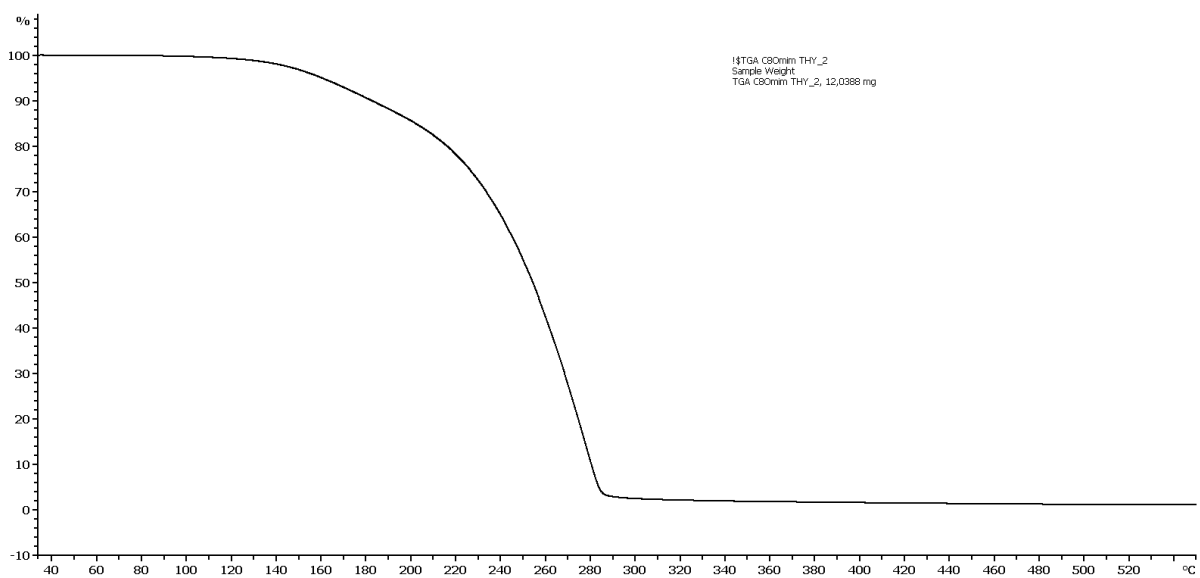

TGA curve for compound TY-7

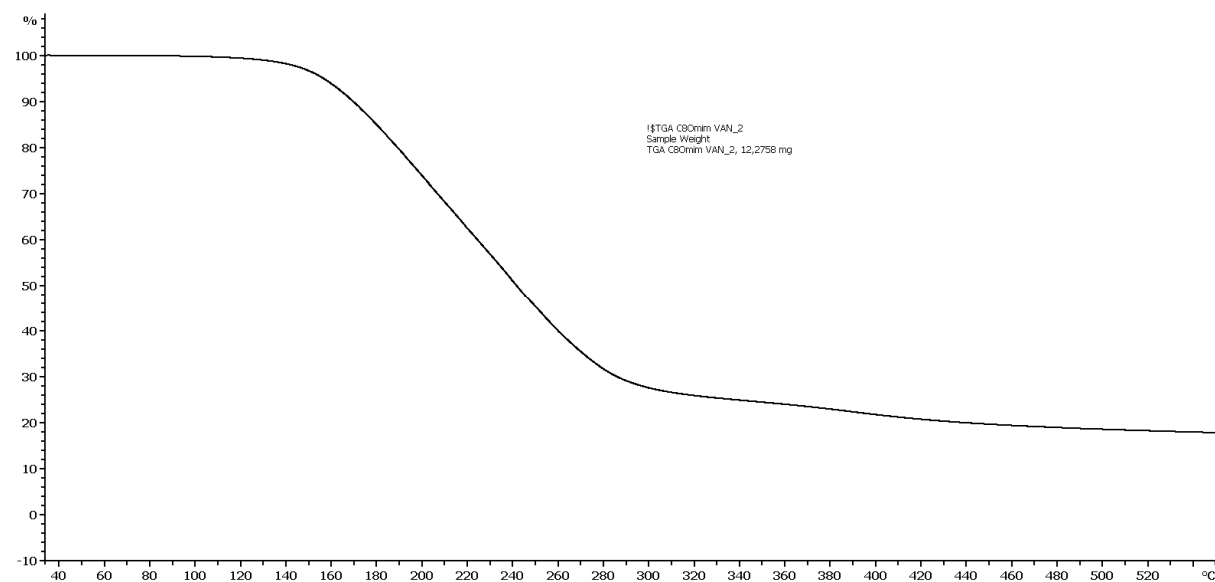

TGA curve for compound VA-8

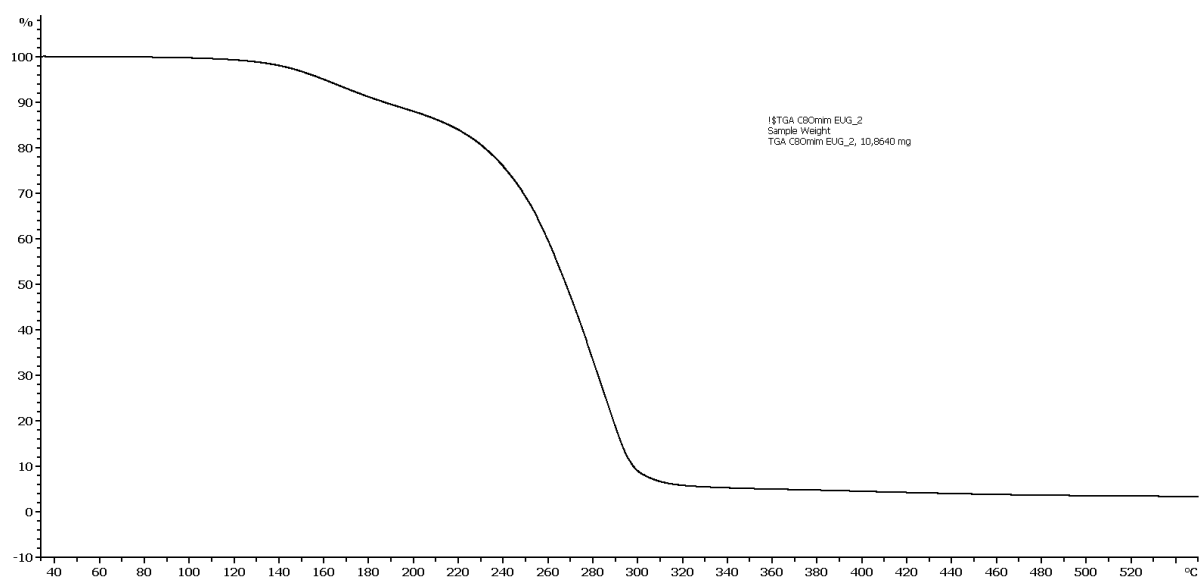

TGA curve for compound EV-9

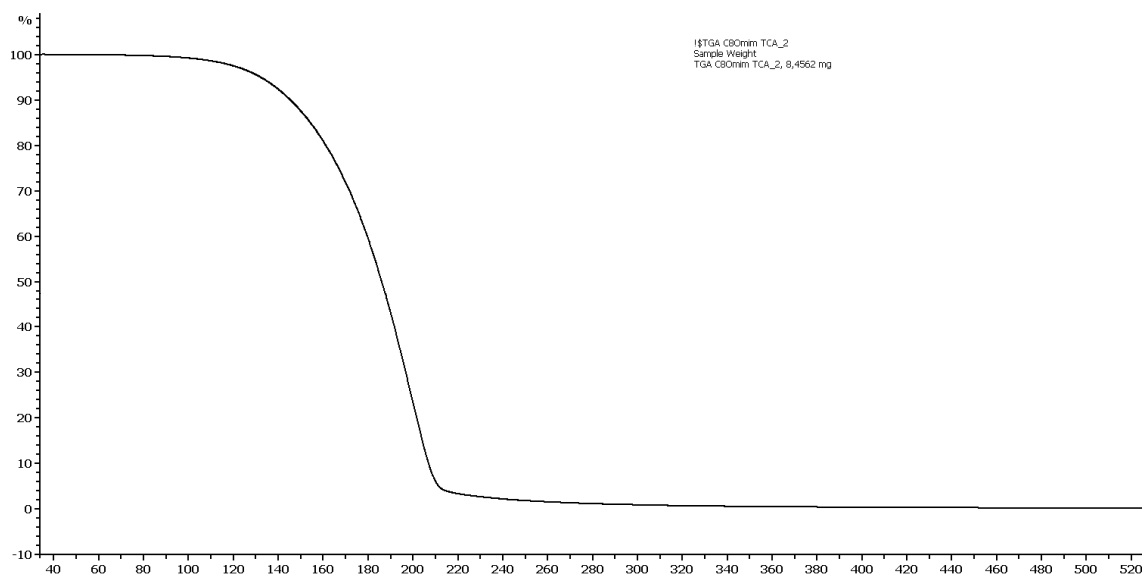

TGA curve for compound TR-10

## Section S1.4. Elementary analysis

**Table S3.** Elementary analysis for obtained ionic liquids

| Compound | Formula               | calculated                                                 | obtained                                                   |
|----------|-----------------------|------------------------------------------------------------|------------------------------------------------------------|
| FE-1     | $C_{19}H_{30}N_2O_4S$ | C(59.66%)<br>H(7.91%)<br>N(7.32%)<br>O(16.73%)<br>S(8.38%) | C(59.18%)<br>H(7.42%)<br>N(6.85%)<br>O(16.21%)<br>S(7.91%) |
| BE-2     | $C_{19}H_{30}N_2O_5S$ | C(57.26%)<br>H(7.59%)<br>N(7.03%)<br>O(20.07%)             | C(57.69%)<br>H(7.96%)<br>N(7.44%)<br>O(20.45%)             |



|       |                      |                                                              |                                                              |
|-------|----------------------|--------------------------------------------------------------|--------------------------------------------------------------|
|       |                      | S(8.05%)                                                     | S(8.52%)                                                     |
| OR-3  | $C_{25}H_{40}N_2O_4$ | C(69.41%)<br>H(9.32%)<br>N(6.48%)<br>O(14.79%)               | C(69.01%)<br>H(8.92%)<br>N(6.09%)<br>O(14.38%)               |
| CL-4  | $C_{13}H_{25}ClN_2O$ | C(59.87%)<br>H(9.66%)<br>Cl(13.59%)<br>N(10.74%)<br>O(6.13%) | C(59.25%)<br>H(9.13%)<br>Cl(13.02%)<br>N(10.20%)<br>O(5.73%) |
| MR-5  | $C_{14}H_{26}N_2O_3$ | C(62.19%)<br>H(9.69%)<br>N(10.36%)<br>O(17.75%)              | C(62.49%)<br>H(9.98%)<br>N(10.66%)<br>O(18.09%)              |
| PR-6  | $C_{15}H_{28}N_2O_3$ | C(63.35%)<br>H(9.92%)<br>N(9.85%)<br>O(16.88%)               | C(63.02%)<br>H(9.66%)<br>N(9.23%)<br>O(16.26%)               |
| TY-7  | $C_{25}H_{40}N_2O_4$ | C(69.41%)<br>H(9.32%)<br>N(6.48%)<br>O(14.79%)               | C(69.90%)<br>H(9.78%)<br>N(6.96%)<br>O(15.26%)               |
| VA-8  | $C_{23}H_{34}N_2O_6$ | C(63.57%)<br>H(7.89%)<br>N(6.45%)<br>O(22.09%)               | C(63.05%)<br>H(7.36%)<br>N(5.99%)<br>O(21.66%)               |
| EV-9  | $C_{25}H_{38}N_2O_5$ | C(67.24%)<br>H(8.58%)<br>N(6.27%)<br>O(17.91%)               | C(67.81%)<br>H(8.93%)<br>N(6.81%)<br>O(18.42%)               |
| TR-10 | $C_{18}H_{34}N_2O_3$ | C(66.22%)<br>H(10.50%)<br>N(8.58%)<br>O(14.70%)              | C(66.44%)<br>H(10.93%)<br>N(8.99%)<br>O(15.07%)              |

## Section S1.5. <sup>1</sup>H and <sup>13</sup>C-NMR spectroscopy

The novel group of imidazolium based ionic liquids was characterized by <sup>1</sup>H and <sup>13</sup>C-NMR spectroscopy. <sup>1</sup>H and <sup>13</sup>C NMR spectra were recorded at 25 °C using a 400 MHz (for <sup>1</sup>H) and 100 MHz (for <sup>13</sup>C) Bruker NMR spectrometer.

1-methyl-3-octyloxymetyloimidazolium 4-hydroxybenzenesulfonate (FE-1):

<sup>1</sup>H NMR (DMSO-d<sub>6</sub>) δ ppm = 0.84-0.87 (t, J=6.85 Hz, 3H); 1.23-1.27 (m, 12H); 1.47 (m, 2H); 3.45-3.48 (m, 3H); 6.8-6.70 (d, 2H); 7.42-7.44 (d, 2H); 7.79 (s, 1H); 7.86 (s, 1H); 9.38 (s, 1H).

<sup>13</sup>C NMR (DMSO-d<sub>6</sub>) δ ppm = 13.97; 22.16; 25.37; 28.77; 28.79; 29.03; 31.36; 35.91; 69.18; 78.09; 114.06; 121.87; 124.01; 127.02; 137.26; 139.04; 157.72.

1-methyl-3-octyloxymethylimidazolium benzenesulfonate (BE-2):

<sup>1</sup>H NMR (DMSO-d<sub>6</sub>) δ ppm = 0.84-0.87 (t, J=6.8 Hz, 3H); 1.23-1.27 (m, 12H); 1.47 (m, 2H); 3.89 (s, 3H); 5.56 (s, 2H); 7.31-7.64 (m, 5H); 7.78 (s, 1H); 7.86 (s, 1H); 9.34 (s, 1H).

<sup>13</sup>C NMR (DMSO-d<sub>6</sub>) δ ppm = 13.99; 22.17; 25.38; 28.71; 28.77; 29.05; 31.36; 35.95; 69.19; 78.12; 121.90; 124.03; 125.46; 127.70; 128.53; 137.20; 148.13.

1-methyl-3-octyloxymethylimidazolium carvacroloxyacetate (OR-3):

<sup>1</sup>H NMR (DMSO-d<sub>6</sub>) δ ppm = 0.84-0.87 (t, J=6.85 Hz, 3H); 1.12-1.14 (d, 6H); 1.22-1.27 (m, 12H); 1.46 (m, 2H); 2.74 (m, 1H); 3.87 (s, 3H); 5.57 (d, 2H); 6.59-6.61 (m, 2H); 6.94-6.96 (m, 1H); 7.83 (s, 1H); 7.91 (s, 1H); 9.90 (s, 1H).

<sup>13</sup>C NMR (DMSO-d<sub>6</sub>) δ ppm = 13.95; 1.92; 22.16; 23.96; 25.40; 28.74; 28.77; 29.03; 31.36; 35.91; 68.08; 6.08; 77.93; 109.72; 116.52; 121.87; 122.61; 123.99; 127.02; 137.99; 146.76; 157.18; 170.61.

1-methyl-3-octyloxymethylimidazolium chloride (CL-4):

<sup>1</sup>H NMR (DMSO-d<sub>6</sub>) δ ppm = 0.84-0.87 (t, J=6.85 Hz, 3H); 1.23-1.28 (m, 12H); 1.49 (m, 2H); 3.50-3.53 (t, J=6.5 Hz, 3H); 5.69 (s, 2H); 7.85-7.86 (t, J=1.75 Hz, 1H); 8.01-8.02 (t, J=1.8Hz,1H); 9.82 (s, 1H).

<sup>13</sup>C NMR (DMSO-d<sub>6</sub>) δ ppm = 13.89; 22.09; 25.34; 28.70; 28.74; 28.96; 31.29; 35.87; 69.11; 77.90; 121.85; 123.93; 137.39.

1-methyl-3-octyloxymethylimidazolium formate (MR-5):

<sup>1</sup>H NMR (DMSO-d<sub>6</sub>) δ ppm = 0.84-0.87 (t, J=6.85 Hz, 3H); 1.23-1.28 (m, 12H); 1.49 (m, 2H); 3.42-3.49 (m, 3H); 5.52 (s, 2H); 7.84-7.85 (t, J=1.7 Hz, 1H); 7.91-7.92 (t, J=1.7Hz, 1H); 9.53 (s, 1H); 9.72 (s, 1H).

<sup>13</sup>C NMR (DMSO-d<sub>6</sub>) δ ppm = 13.92; 22.13; 25.37; 28.71; 28.74; 29.00; 31.33; 35.87; 69.14; 78.02; 121.87; 124.02; 137.64; 165.65.

1-methyl-3-octyloxymethylimidazolium propionate (PR-6):

<sup>1</sup>H NMR (DMSO-d<sub>6</sub>) δ ppm = 0.84-0.87 (t, J=6.85 Hz, 3H); 1.23-1.27 (m, 12H); 1.49 (m, 2H); 1.67 (s, 3H); 3.93 (m, 3H); 4.86 (s, 2H); 5.62 (s, 2H); 7.84 (s, 1H); 7.91(s, 1H); 9.87 (s, 1H).

<sup>13</sup>C NMR (DMSO-d<sub>6</sub>) δ ppm = 13.90; 18.54, 22.12; 25.36; 28.70; 28.73; 28.75; 28.99; 31.32; 35.81; 55.90; 69.09; 77.98; 121.83; 123.98; 137.92; 173.64.

1-methyl-3-octyloxymethylimidazolium thymoloxylacetate (TY-7):

<sup>1</sup>H NMR (DMSO-d<sub>6</sub>) δ ppm = 0.84-0.87 (t, J=6.85 Hz, 3H); 1.12-1.14 (d, 6H); 1.22-1.27 (m, 12H); 1.46 (m, 2H); 2.74 (m, 1H); 3.87 (s, 3H); 5.57 (d, 2H); 6.59-6.61 (m, 2H); 6.94-6.96 (m, 1H); 7.83 (s, 1H); 7.91 (s, 1H); 9.90 (s, 1H).

<sup>13</sup>C NMR (DMSO-d<sub>6</sub>) δ ppm = 13.95; 15.92; 22.16; 23.96; 25.40; 28.74; 28.77; 29.03; 31.36; 35.91; 68.08; 69.08; 77.93; 109.72; 116.52; 121.87; 122.61; 123.99; 12.,02; 137.99; 146.76; 157.18; 170.61.

1-methyl-3-octyloxymethylimidazolium vanillinoloxylacetate (VA-8):

<sup>1</sup>H NMR (DMSO-d<sub>6</sub>) δ ppm = 0.84-0.87 (t, J=6.7 Hz, 3H); 1.21 (m, 12H); 1.47 (m, 2H); 3.50-3.53 (m, 3H); 3.82-3.93 (m, 3H); 4.36 (s, 2H); 5.59 (s, 2H); 6.74-6.76 (m, 1H); 7.36-7.89 (m, 2H); 9.57 (s, 1H); 9.81 (s, 1H).

<sup>13</sup>C NMR (DMSO-d<sub>6</sub>) δ ppm = 13.98; 22.16; 25.37; 28.76; 29.01 29.04; 31.35; 35.95; 55.11; 69.20; 77.16; 109.62; 116.04; 121.91; 124.05; 124.18; 127.98; 147.95; 149.76; 160.86; 189.19.

1-methyl-3-octyloxymethylimidazolium eugenoloxylacetate (EV-9):

<sup>1</sup>H NMR (DMSO-d<sub>6</sub>) δ ppm = 0.83-0.87 (t, J=6.9 Hz, 3H), 1.21-1.27 (m, 12H), 1.45 (s, 2H), 3.25-3.27 (d, 2H), 3.69 (s, 3H), 3.86 (s, 3H), 4.15 (s, 2H), 4.99-5.08 (m, 2H), 5.57 (s, 2H); 5.89-5.95 (m, 1H); 6.57-6.59 (m, 1H) 6.65-6.70 (m, 2H); 7.81 (s, 1H); 7.88 (s, 1H); 9.90 (s, 1H).

<sup>13</sup>C NMR (DMSO-d<sub>6</sub>) δ ppm = 13.95; 22.15; 25.40; 28.76; 28.80; 29.02; 29.05; 31.35; 35.71; 35.72; 55.29; 55.21; 68.07; 69.08; 77.95; 112.09; 112.50; 115.24; 119.93; 121.78; 123.95; 131.01; 138.10; 146.90; 148.39; 170.53.

1-methyl-3-octyloxymethylimidazolium trimethylacetate (TR-10):

<sup>1</sup>H NMR (DMSO-d<sub>6</sub>) δ ppm = 0.84-0.87 (t, J=6.9 Hz, 3H); 1.00 (s, 9H), 1.23-1.27 (m, 12H); 1.48 (m, 2H); 3.94 (m, 3H); 5.65 (s, 2H); 7.86-7.87 (t, J=1.7 Hz, 1H); 7.93-7.94 (t, J=1.7 Hz, 1H); 10.29 (s, 1H).

<sup>13</sup>C NMR (DMSO-d<sub>6</sub>) δ ppm = 13.92; 22.16; 25.37; 28.68; 28.73; 28.77; 28.80; 29.02; 29.06; 31.32; 35.74; 69.01; 77.89; 121.84; 123.99; 138.62; 180.84.

# 1-methyl-3-octyloxymetyloimidazolium 4-hydroxybenzenesulfonate (FE-1):

This report was created by ACD/NMR Processor Academic Edition. For more information go to [www.acdlabs.com/nmrproc/](http://www.acdlabs.com/nmrproc/)

2021-11-16 19:55:24

|                        |                                  |                 |             |                        |                |
|------------------------|----------------------------------|-----------------|-------------|------------------------|----------------|
| Acquisition Time (sec) | 5.0000                           | Date            | Nov 15 2021 | Date Stamp             | Nov 15 2021    |
| File Name              | d:\Users\Michal\Desktop\MW-1.fid | Frequency (MHz) | 399.91      | Nucleus                | <sup>1</sup> H |
| Original Points Count  | 37879                            | Points Count    | 65536       | Receiver Gain          | 18.00          |
| Spectrum Offset (Hz)   | 3419.2983                        | Spectrum Type   | STANDARD    | Sweep Width (Hz)       | 7575.76        |
|                        |                                  |                 |             | Temperature (degree C) | 25.000         |

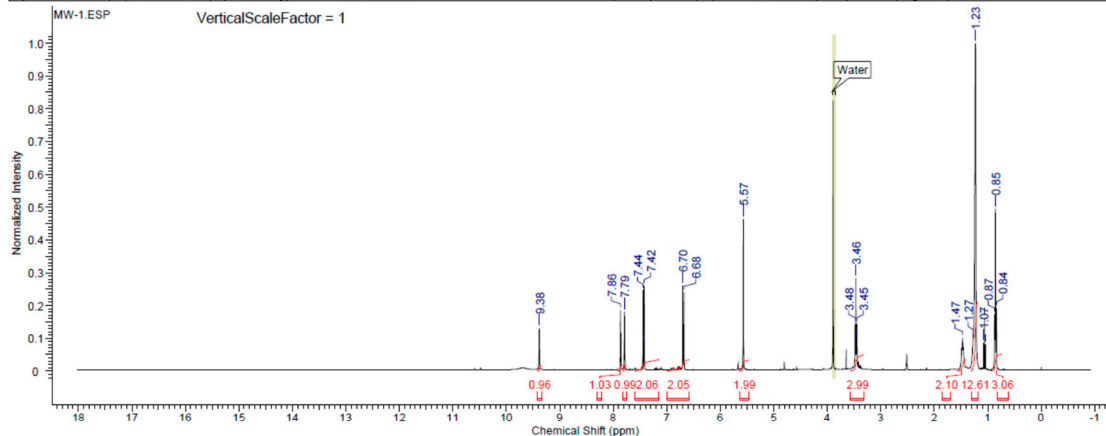

| No. | (ppm)         | Annotation | Layer No. | Created By | Created At          | Modified By | Modified At |
|-----|---------------|------------|-----------|------------|---------------------|-------------|-------------|
| 1   | [3.85...3.90] | Water      | 1         | Michal     | 2021-11-16 16:25:41 |             |             |

  

| No. | (ppm) | (Hz)  | Height | No. | (ppm) | (Hz)   | Height | No. | (ppm) | (Hz)   | Height | No. | (ppm) | (Hz)   | Height | No. | (ppm) | (Hz)   | Height |
|-----|-------|-------|--------|-----|-------|--------|--------|-----|-------|--------|--------|-----|-------|--------|--------|-----|-------|--------|--------|
| 1   | 0.84  | 334.7 | 0.1922 | 6   | 1.07  | 429.9  | 0.0856 | 11  | 3.46  | 1382.0 | 0.0958 | 16  | 6.68  | 2672.5 | 0.0841 | 21  | 7.79  | 3115.4 | 0.1810 |
| 2   | 0.85  | 341.8 | 0.4948 | 7   | 1.23  | 491.4  | 1.0000 | 12  | 3.46  | 1384.8 | 0.2833 | 17  | 6.70  | 2679.2 | 0.2604 | 22  | 7.86  | 3144.9 | 0.1855 |
| 3   | 0.87  | 348.4 | 0.1735 | 8   | 1.27  | 509.0  | 0.1079 | 13  | 3.48  | 1391.3 | 0.1439 | 18  | 7.42  | 2967.8 | 0.2593 | 23  | 9.38  | 3752.0 | 0.1310 |
| 4   | 1.04  | 415.9 | 0.0812 | 9   | 1.47  | 587.8  | 0.1013 | 14  | 5.57  | 2226.8 | 0.4637 | 19  | 7.43  | 2969.8 | 0.0847 |     |       |        |        |
| 5   | 1.06  | 422.9 | 0.1626 | 10  | 3.45  | 1378.2 | 0.1443 | 15  | 6.68  | 2670.5 | 0.2397 | 20  | 7.44  | 2976.5 | 0.2455 |     |       |        |        |

This report was created by ACD/NMR Processor Academic Edition. For more information go to [www.acdlabs.com/nmrproc/](http://www.acdlabs.com/nmrproc/)

2021-11-16 19:58:33

|                        |                                      |                 |             |                        |                 |
|------------------------|--------------------------------------|-----------------|-------------|------------------------|-----------------|
| Acquisition Time (sec) | 1.0000                               | Date            | Nov 15 2021 | Date Stamp             | Nov 15 2021     |
| File Name              | d:\Users\Michal\Desktop\MW-1-C13.fid | Frequency (MHz) | 100.57      | Nucleus                | <sup>13</sup> C |
| Original Points Count  | 22322                                | Points Count    | 32768       | Receiver Gain          | 58.00           |
| Spectrum Offset (Hz)   | 9728.0635                            | Spectrum Type   | STANDARD    | Sweep Width (Hz)       | 22321.43        |
|                        |                                      |                 |             | Temperature (degree C) | 25.000          |

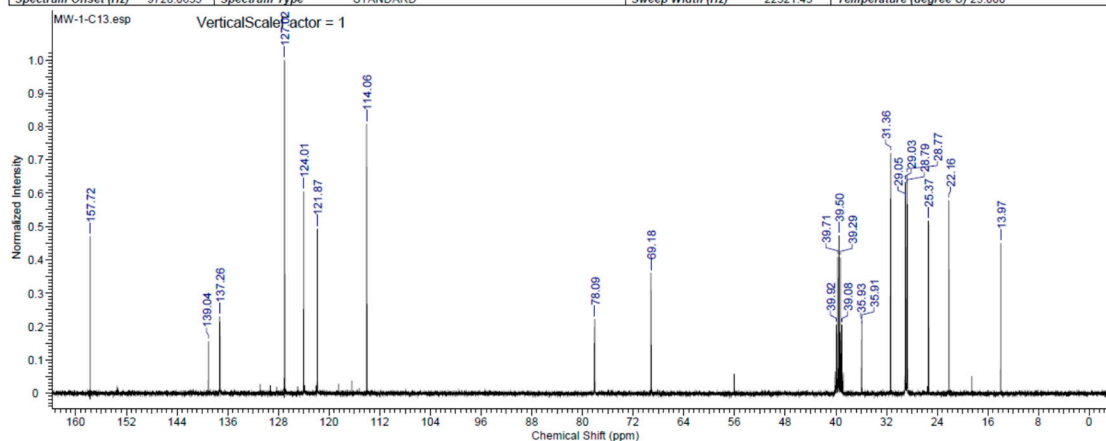

| No. | (ppm) | (Hz)   | Height | No. | (ppm) | (Hz)   | Height | No. | (ppm) | (Hz)   | Height | No. | (ppm)  | (Hz)    | Height | No. | (ppm)  | (Hz)    | Height |
|-----|-------|--------|--------|-----|-------|--------|--------|-----|-------|--------|--------|-----|--------|---------|--------|-----|--------|---------|--------|
| 1   | 13.97 | 1404.6 | 0.4503 | 6   | 28.79 | 2895.1 | 0.6221 | 11  | 35.93 | 3613.1 | 0.2008 | 16  | 39.92  | 4014.4  | 0.2054 | 21  | 124.01 | 12471.0 | 0.6050 |
| 2   | 22.16 | 2228.9 | 0.5779 | 7   | 29.03 | 2919.0 | 0.6330 | 12  | 39.08 | 3930.6 | 0.2047 | 17  | 69.18  | 6957.2  | 0.3611 | 22  | 127.02 | 12773.4 | 1.0000 |
| 3   | 25.37 | 2551.8 | 0.5169 | 8   | 29.05 | 2921.7 | 0.5809 | 13  | 39.29 | 3951.7 | 0.4061 | 18  | 78.09  | 7853.0  | 0.2210 | 23  | 137.26 | 13804.1 | 0.2291 |
| 4   | 28.71 | 2887.6 | 0.5666 | 9   | 31.36 | 3153.3 | 0.7199 | 14  | 39.50 | 3972.1 | 0.4727 | 19  | 114.06 | 11471.0 | 0.8079 | 24  | 139.04 | 13982.6 | 0.1554 |
| 5   | 28.77 | 2893.1 | 0.6547 | 10  | 35.91 | 3611.8 | 0.2156 | 15  | 39.71 | 3993.2 | 0.4084 | 20  | 121.87 | 12255.7 | 0.4934 | 25  | 157.72 | 15860.7 | 0.4706 |

# 1-methyl-3-octyloxymethylimidazolium benzenesulfonate (BE-2):

This report was created by ACD/NMR Processor Academic Edition. For more information go to [www.acdlabs.com/nmrproc/](http://www.acdlabs.com/nmrproc/)

2021-11-17 18:44:00

|                        |                                     |                 |             |                  |                |                        |        |         |         |
|------------------------|-------------------------------------|-----------------|-------------|------------------|----------------|------------------------|--------|---------|---------|
| Acquisition Time (sec) | 5.0001                              | Date            | Nov 17 2021 | Date Stamp       | Nov 17 2021    |                        |        |         |         |
| File Name              | d:\Users\Michal\Desktop\MW-2.fidfid | Frequency (MHz) | 399.91      | Nucleus          | <sup>1</sup> H | Number of Transients   | 40     |         |         |
| Original Points Count  | 30941                               | Points Count    | 32768       | Pulse Sequence   | s2pul          | Receiver Gain          | 18.00  | Solvent | DMSO-d6 |
| Spectrum Offset (Hz)   | 2743.7021                           | Spectrum Type   | STANDARD    | Sweep Width (Hz) | 6188.12        | Temperature (degree C) | 25.000 |         |         |

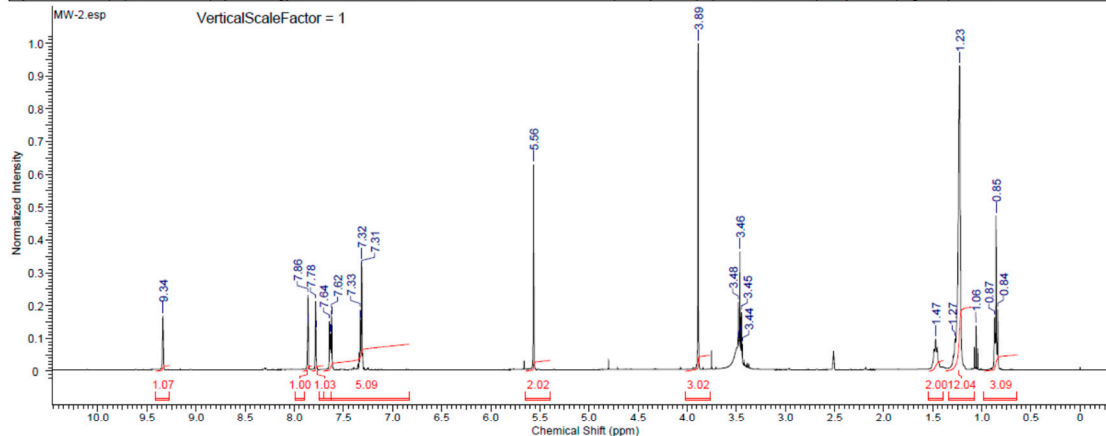

| No. | (ppm) | (Hz)  | Height | No. | (ppm) | (Hz)   | Height | No. | (ppm) | (Hz)   | Height | No. | (ppm) | (Hz)   | Height | No. | (ppm) | (Hz)   | Height |
|-----|-------|-------|--------|-----|-------|--------|--------|-----|-------|--------|--------|-----|-------|--------|--------|-----|-------|--------|--------|
| 1   | 0.84  | 334.8 | 0.1880 | 8   | 3.44  | 1375.0 | 0.0828 | 15  | 5.56  | 2225.0 | 0.6307 | 22  | 7.63  | 3051.2 | 0.1141 | 29  | 7.79  | 3113.9 | 0.1391 |
| 2   | 0.85  | 341.8 | 0.4741 | 9   | 3.45  | 1378.4 | 0.1804 | 16  | 7.31  | 2924.0 | 0.3188 | 23  | 7.63  | 3052.9 | 0.1126 | 30  | 7.66  | 3141.7 | 0.1401 |
| 3   | 0.87  | 348.4 | 0.1645 | 10  | 3.46  | 1382.0 | 0.1108 | 17  | 7.32  | 2925.9 | 0.3341 | 24  | 7.64  | 3053.7 | 0.0978 | 31  | 7.66  | 3143.6 | 0.2323 |
| 4   | 1.06  | 423.2 | 0.1385 | 11  | 3.46  | 1384.8 | 0.3646 | 18  | 7.32  | 2928.9 | 0.1558 | 25  | 7.64  | 3055.0 | 0.0899 | 32  | 7.67  | 3145.3 | 0.1375 |
| 5   | 1.23  | 490.4 | 0.9323 | 12  | 3.47  | 1389.0 | 0.0935 | 19  | 7.33  | 2931.1 | 0.1876 | 26  | 7.64  | 3056.0 | 0.1524 | 33  | 9.34  | 3734.3 | 0.1693 |
| 6   | 1.27  | 508.9 | 0.0985 | 13  | 3.48  | 1391.4 | 0.2109 | 20  | 7.62  | 3046.1 | 0.1652 | 27  | 7.78  | 3110.5 | 0.1256 |     |       |        |        |
| 7   | 1.47  | 588.0 | 0.0990 | 14  | 3.89  | 1555.4 | 1.0000 | 21  | 7.62  | 3048.0 | 0.1853 | 28  | 7.78  | 3112.2 | 0.2137 |     |       |        |        |

This report was created by ACD/NMR Processor Academic Edition. For more information go to [www.acdlabs.com/nmrproc/](http://www.acdlabs.com/nmrproc/)

2021-11-16 19:57:00

|                        |                                         |                 |             |                  |                 |                        |        |         |         |
|------------------------|-----------------------------------------|-----------------|-------------|------------------|-----------------|------------------------|--------|---------|---------|
| Acquisition Time (sec) | 1.0000                                  | Date            | Nov 15 2021 | Date Stamp       | Nov 15 2021     |                        |        |         |         |
| File Name              | d:\Users\Michal\Desktop\MW-2-C13.fidfid | Frequency (MHz) | 100.57      | Nucleus          | <sup>13</sup> C | Number of Transients   | 944    |         |         |
| Original Points Count  | 22322                                   | Points Count    | 32768       | Pulse Sequence   | s2pul           | Receiver Gain          | 58.00  | Solvent | DMSO-d6 |
| Spectrum Offset (Hz)   | 9729.0850                               | Spectrum Type   | STANDARD    | Sweep Width (Hz) | 22321.43        | Temperature (degree C) | 25.000 |         |         |

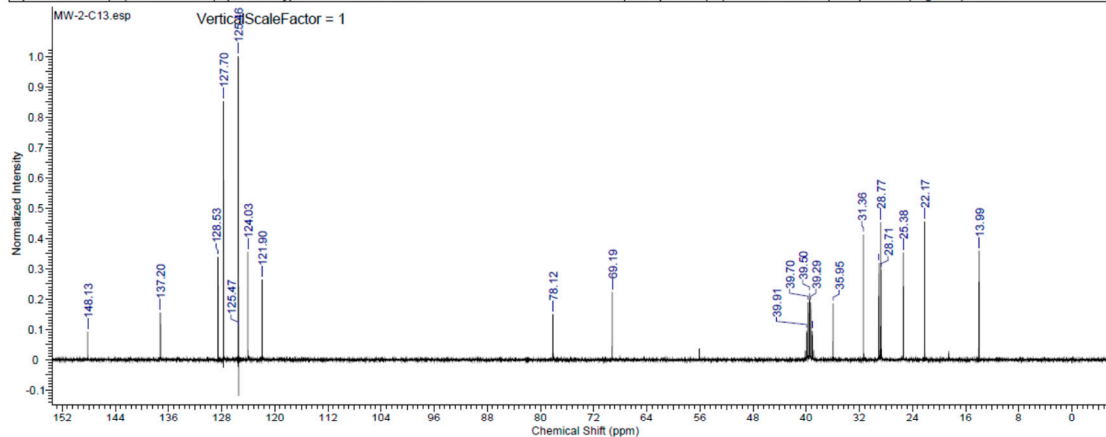

| No. | (ppm) | (Hz)   | Height | No. | (ppm) | (Hz)   | Height | No. | (ppm) | (Hz)   | Height | No. | (ppm)  | (Hz)    | Height | No. | (ppm)  | (Hz)    | Height |
|-----|-------|--------|--------|-----|-------|--------|--------|-----|-------|--------|--------|-----|--------|---------|--------|-----|--------|---------|--------|
| 1   | 13.99 | 1407.0 | 0.3592 | 6   | 29.02 | 2918.6 | 0.2881 | 11  | 39.29 | 3951.3 | 0.1888 | 16  | 78.12  | 7856.1  | 0.1499 | 21  | 127.70 | 12841.9 | 0.8514 |
| 2   | 22.17 | 2229.2 | 0.4548 | 7   | 29.05 | 2921.3 | 0.3183 | 12  | 39.50 | 3972.5 | 0.2185 | 17  | 121.90 | 12258.8 | 0.2633 | 22  | 128.53 | 12925.7 | 0.3379 |
| 3   | 25.38 | 2552.1 | 0.3531 | 8   | 31.36 | 3153.6 | 0.4119 | 13  | 39.70 | 3992.9 | 0.1879 | 18  | 124.03 | 12472.7 | 0.3550 | 23  | 137.20 | 13797.7 | 0.1555 |
| 4   | 28.71 | 2887.3 | 0.2964 | 9   | 35.95 | 3615.5 | 0.1851 | 14  | 39.91 | 4014.0 | 0.0946 | 19  | 125.46 | 12617.1 | 1.0000 | 24  | 148.13 | 14896.5 | 0.0917 |
| 5   | 28.77 | 2893.4 | 0.4529 | 10  | 39.08 | 3930.2 | 0.0940 | 15  | 69.19 | 6958.2 | 0.2227 | 20  | 125.47 | 12618.5 | 0.1032 |     |        |         |        |

# 1-methyl-3-octyloxymethylimidazolium carvacroloxyacetate (OR-3):

This report was created by ACD/NMR Processor Academic Edition. For more information go to [www.acdlabs.com/nmrproc/](http://www.acdlabs.com/nmrproc/)

2021-11-17 18:45:07

|                        |                                  |                 |             |                  |                |                        |        |         |         |
|------------------------|----------------------------------|-----------------|-------------|------------------|----------------|------------------------|--------|---------|---------|
| Acquisition Time (sec) | 4.9999                           | Date            | Nov 16 2021 | Date Stamp       | Nov 16 2021    |                        |        |         |         |
| File Name              | d:\Users\Michal\Desktop\MW-7.fid | Frequency (MHz) | 399.91      | Nucleus          | <sup>1</sup> H | Number of Transients   | 64     |         |         |
| Original Points Count  | 32216                            | Points Count    | 32768       | Pulse Sequence   | s2pul          | Receiver Gain          | 18.00  | Solvent | DMSO-d6 |
| Spectrum Offset (Hz)   | 2851.3411                        | Spectrum Type   | STANDARD    | Sweep Width (Hz) | 6443.30        | Temperature (degree C) | 25.000 |         |         |

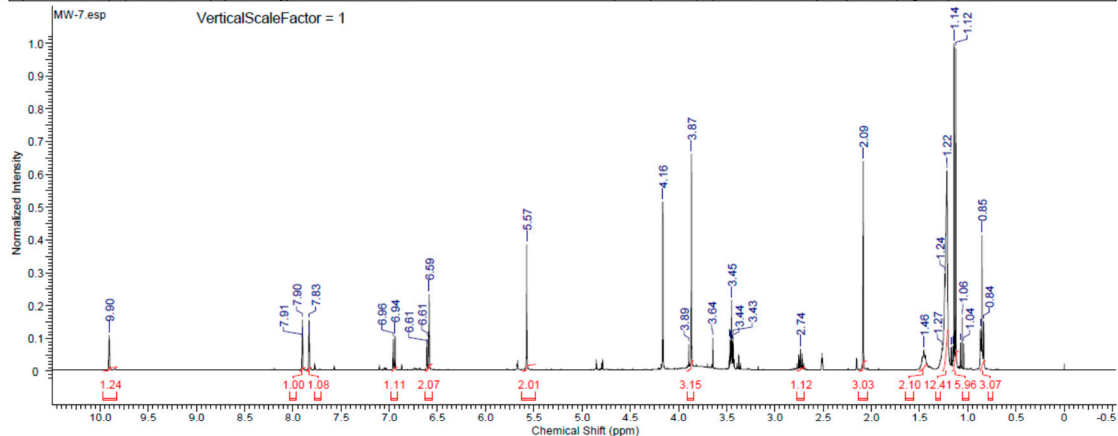

| No. | (ppm) | (Hz)  | Height | No. | (ppm) | (Hz)   | Height | No. | (ppm) | (Hz)   | Height | No. | (ppm) | (Hz)   | Height | No. | (ppm) | (Hz)   | Height |
|-----|-------|-------|--------|-----|-------|--------|--------|-----|-------|--------|--------|-----|-------|--------|--------|-----|-------|--------|--------|
| 1   | 0.84  | 334.1 | 0.1511 | 9   | 1.15  | 461.3  | 0.0754 | 17  | 3.43  | 1373.1 | 0.1064 | 25  | 4.16  | 1664.7 | 0.5165 | 33  | 7.83  | 3131.8 | 0.1557 |
| 2   | 0.85  | 341.1 | 0.4144 | 10  | 1.17  | 468.2  | 0.0741 | 18  | 3.44  | 1376.8 | 0.0919 | 26  | 5.57  | 2229.5 | 0.3860 | 34  | 7.84  | 3133.6 | 0.1084 |
| 3   | 0.87  | 347.8 | 0.1293 | 11  | 1.22  | 486.6  | 0.6108 | 19  | 3.45  | 1379.6 | 0.2166 | 27  | 6.59  | 2634.2 | 0.2342 | 35  | 7.90  | 3157.8 | 0.1039 |
| 4   | 1.04  | 416.6 | 0.0844 | 12  | 1.24  | 495.9  | 0.2981 | 20  | 3.46  | 1383.7 | 0.0936 | 28  | 6.61  | 2642.0 | 0.0979 | 36  | 7.90  | 3159.6 | 0.1564 |
| 5   | 1.06  | 423.7 | 0.1646 | 13  | 1.27  | 506.9  | 0.0706 | 21  | 3.47  | 1386.3 | 0.0990 | 29  | 6.61  | 2643.6 | 0.0744 | 37  | 7.91  | 3161.3 | 0.0939 |
| 6   | 1.08  | 430.6 | 0.0864 | 14  | 1.46  | 582.4  | 0.0638 | 22  | 3.64  | 1457.7 | 0.1018 | 30  | 6.94  | 2775.5 | 0.1077 | 38  | 9.90  | 3960.9 | 0.1108 |
| 7   | 1.12  | 449.9 | 0.9842 | 15  | 2.09  | 833.9  | 0.6394 | 23  | 3.87  | 1546.3 | 0.6631 | 31  | 6.96  | 2783.0 | 0.0961 |     |       |        |        |
| 8   | 1.14  | 456.8 | 1.0000 | 16  | 2.74  | 1094.1 | 0.0688 | 24  | 3.89  | 1556.8 | 0.0823 | 32  | 7.83  | 3130.3 | 0.0850 |     |       |        |        |

This report was created by ACD/NMR Processor Academic Edition. For more information go to [www.acdlabs.com/nmrproc/](http://www.acdlabs.com/nmrproc/)

2021-11-17 18:46:37

|                        |                                      |                 |             |                  |                 |                        |        |         |         |
|------------------------|--------------------------------------|-----------------|-------------|------------------|-----------------|------------------------|--------|---------|---------|
| Acquisition Time (sec) | 1.0000                               | Date            | Nov 16 2021 | Date Stamp       | Nov 16 2021     |                        |        |         |         |
| File Name              | d:\Users\Michal\Desktop\MW-7-C13.fid | Frequency (MHz) | 100.57      | Nucleus          | <sup>13</sup> C | Number of Transients   | 1008   |         |         |
| Original Points Count  | 22322                                | Points Count    | 32768       | Pulse Sequence   | s2pul           | Receiver Gain          | 56.00  | Solvent | DMSO-d6 |
| Spectrum Offset (Hz)   | 9724.6572                            | Spectrum Type   | STANDARD    | Sweep Width (Hz) | 22321.43        | Temperature (degree C) | 25.000 |         |         |

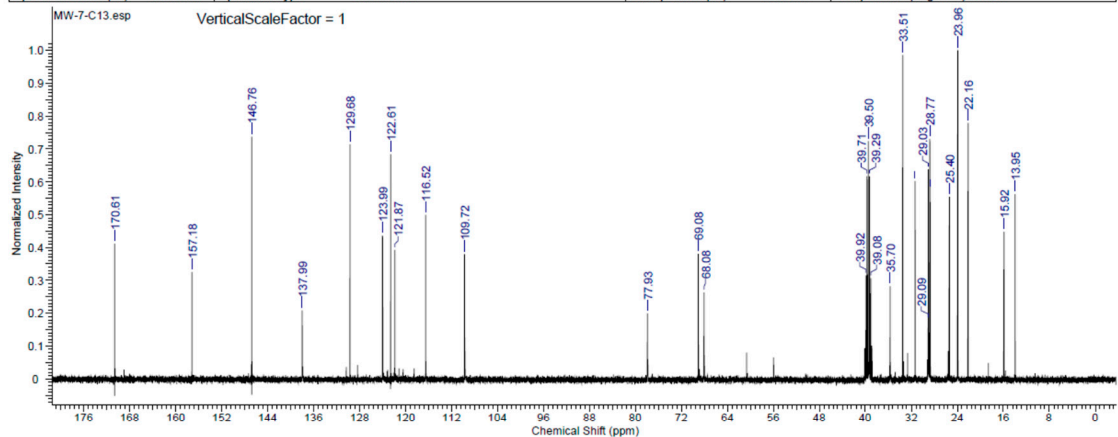

| No. | (ppm) | (Hz)   | Height | No. | (ppm) | (Hz)   | Height | No. | (ppm) | (Hz)   | Height | No. | (ppm)  | (Hz)    | Height | No. | (ppm)  | (Hz)    | Height |
|-----|-------|--------|--------|-----|-------|--------|--------|-----|-------|--------|--------|-----|--------|---------|--------|-----|--------|---------|--------|
| 1   | 13.95 | 1403.3 | 0.5618 | 8   | 28.80 | 2896.5 | 0.5766 | 15  | 35.72 | 3592.7 | 0.2018 | 22  | 69.08  | 6947.0  | 0.3803 | 29  | 129.68 | 13041.8 | 0.7141 |
| 2   | 15.92 | 1600.8 | 0.4479 | 9   | 29.03 | 2919.0 | 0.6370 | 16  | 39.08 | 3930.6 | 0.3067 | 23  | 77.93  | 7836.7  | 0.1992 | 30  | 137.99 | 13877.0 | 0.2086 |
| 3   | 22.16 | 2228.9 | 0.7792 | 10  | 29.05 | 2921.7 | 0.5702 | 17  | 39.29 | 3951.0 | 0.6166 | 24  | 109.72 | 11033.6 | 0.3799 | 31  | 138.01 | 13879.1 | 0.1905 |
| 4   | 23.96 | 2409.4 | 1.0000 | 11  | 29.09 | 2925.1 | 0.1791 | 18  | 39.50 | 3972.1 | 0.7230 | 25  | 116.52 | 11717.6 | 0.4993 | 32  | 146.76 | 14759.2 | 0.7368 |
| 5   | 25.40 | 2554.5 | 0.5543 | 12  | 31.36 | 3153.3 | 0.6020 | 19  | 39.71 | 3993.2 | 0.6162 | 26  | 121.87 | 12256.4 | 0.3920 | 33  | 157.18 | 15806.9 | 0.3249 |
| 6   | 28.74 | 2890.4 | 0.5044 | 13  | 33.51 | 3369.9 | 0.9856 | 20  | 39.92 | 4014.4 | 0.3142 | 27  | 122.61 | 12330.0 | 0.6841 | 34  | 170.61 | 17157.8 | 0.4107 |
| 7   | 28.77 | 2893.8 | 0.7299 | 14  | 35.70 | 3590.6 | 0.2819 | 21  | 68.08 | 6846.2 | 0.2637 | 28  | 123.99 | 12469.6 | 0.4364 |     |        |         |        |

# 1-methyl-3-octyloxymethylimidazolium chloride (CL-4):

This report was created by ACD/NMR Processor Academic Edition. For more information go to [www.acdlabs.com/nmrproc/](http://www.acdlabs.com/nmrproc/)

2021-11-16 19:55:54

|                        |                                  |                 |             |                        |                |
|------------------------|----------------------------------|-----------------|-------------|------------------------|----------------|
| Acquisition Time (sec) | 5.0000                           | Date            | Nov 15 2021 | Date Stamp             | Nov 15 2021    |
| File Name              | d:\Users\Michal\Desktop\MW-4.fid | Frequency (MHz) | 399.91      | Nucleus                | <sup>1</sup> H |
| Original Points Count  | 37879                            | Points Count    | 65536       | Pulse Sequence         | s2pul          |
| Spectrum Offset (Hz)   | 3429.7598                        | Spectrum Type   | STANDARD    | Receiver Gain          | 20.00          |
|                        |                                  |                 |             | Sweep Width (Hz)       | 7575.76        |
|                        |                                  |                 |             | Temperature (degree C) | 25.000         |

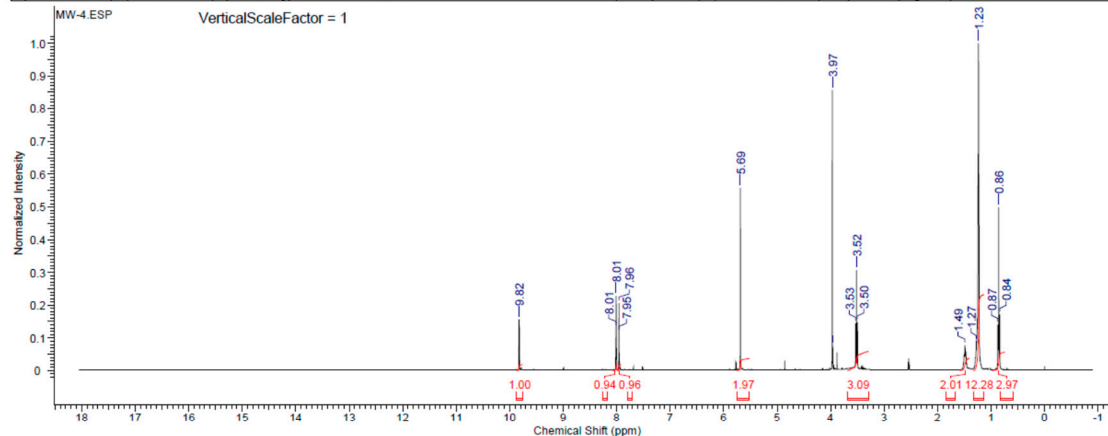

This report was created by ACD/NMR Processor Academic Edition. For more information go to [www.acdlabs.com/nmrproc/](http://www.acdlabs.com/nmrproc/)

2021-11-16 19:57:40

|                        |                                            |                 |             |                        |                 |
|------------------------|--------------------------------------------|-----------------|-------------|------------------------|-----------------|
| Acquisition Time (sec) | 1.0000                                     | Date            | Nov 15 2021 | Date Stamp             | Nov 15 2021     |
| File Name              | d:\Users\Michal\Desktop\MW-4-C13-100sc.fid | Frequency (MHz) | 100.57      | Nucleus                | <sup>13</sup> C |
| Original Points Count  | 22322                                      | Points Count    | 32768       | Pulse Sequence         | s2pul           |
| Spectrum Offset (Hz)   | 9723.9766                                  | Spectrum Type   | STANDARD    | Receiver Gain          | 58.00           |
|                        |                                            |                 |             | Sweep Width (Hz)       | 22321.43        |
|                        |                                            |                 |             | Temperature (degree C) | 25.000          |

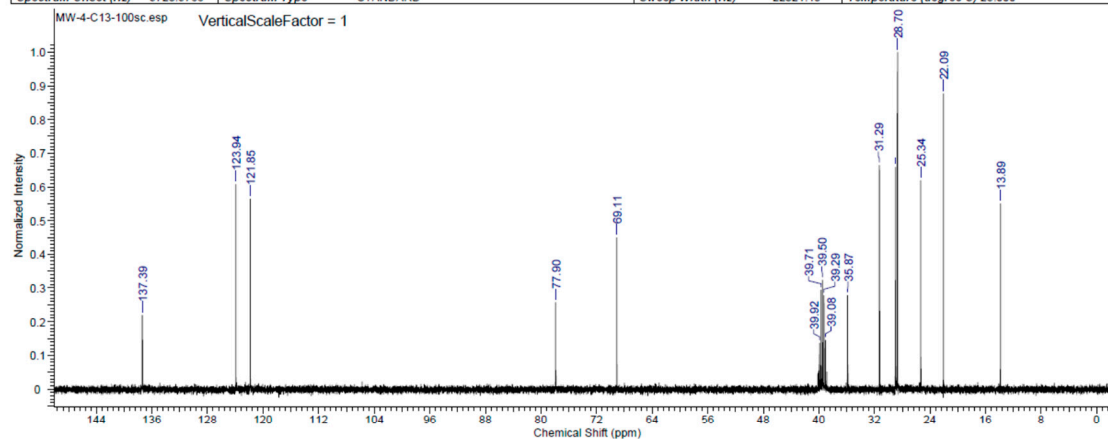



# 1-methyl-3-octyloxymethylimidazolium formate (MR-5):

This report was created by ACD/NMR Processor Academic Edition. For more information go to [www.acdlabs.com/nmrproc/](http://www.acdlabs.com/nmrproc/)

2021-11-16 19:56:21

|                        |                                  |                 |             |                  |                |                        |         |
|------------------------|----------------------------------|-----------------|-------------|------------------|----------------|------------------------|---------|
| Acquisition Time (sec) | 7.0000                           | Date            | Nov 15 2021 | Date Stamp       | Nov 15 2021    |                        |         |
| File Name              | d:\Users\Michal\Desktop\MW-5.fid | Frequency (MHz) | 399.91      | Nucleus          | <sup>1</sup> H | Number of Transients   | 64      |
| Original Points Count  | 45103                            | Points Count    | 65536       | Pulse Sequence   | s2pul          | Solvent                | DMSO-d6 |
| Spectrum Offset (Hz)   | 2856.2053                        | Spectrum Type   | STANDARD    | Sweep Width (Hz) | 6443.30        | Temperature (degree C) | 25.000  |

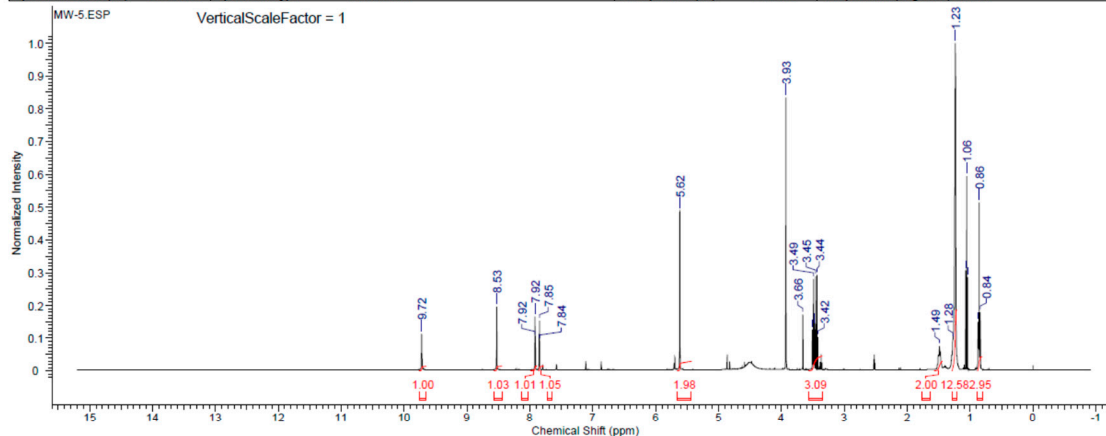

This report was created by ACD/NMR Processor Academic Edition. For more information go to [www.acdlabs.com/nmrproc/](http://www.acdlabs.com/nmrproc/)

2021-11-16 19:58:11

|                        |                                      |                 |             |                  |                 |                        |         |
|------------------------|--------------------------------------|-----------------|-------------|------------------|-----------------|------------------------|---------|
| Acquisition Time (sec) | 1.0000                               | Date            | Nov 15 2021 | Date Stamp       | Nov 15 2021     |                        |         |
| File Name              | d:\Users\Michal\Desktop\MW-5-C13.fid | Frequency (MHz) | 100.57      | Nucleus          | <sup>13</sup> C | Number of Transients   | 800     |
| Original Points Count  | 22322                                | Points Count    | 32768       | Pulse Sequence   | s2pul           | Solvent                | DMSO-d6 |
| Spectrum Offset (Hz)   | 9723.9766                            | Spectrum Type   | STANDARD    | Sweep Width (Hz) | 22321.43        | Temperature (degree C) | 25.000  |

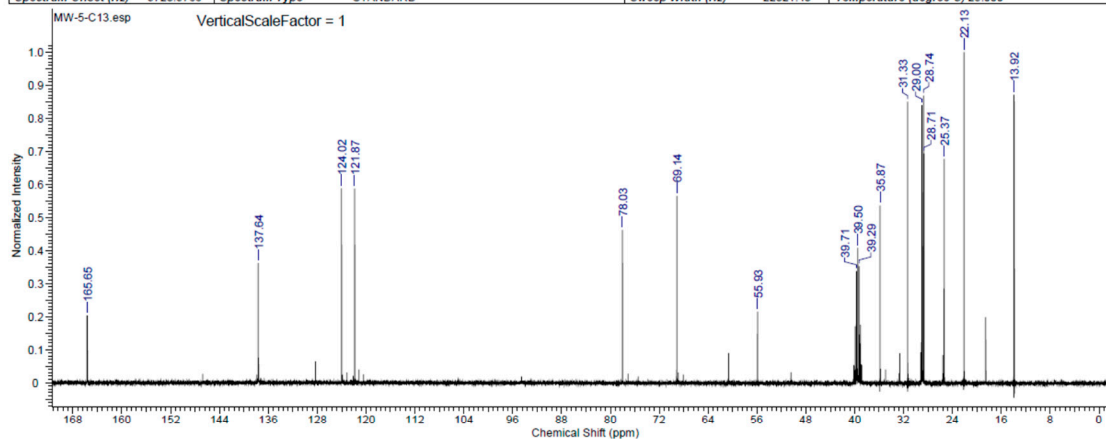



# 1-methyl-3-octyloxymethylimidazolium propionate (PR-6):

This report was created by ACD/NMR Processor Academic Edition. For more information go to [www.acdlabs.com/nmrproc/](http://www.acdlabs.com/nmrproc/)

2021-11-17 18:44:34

|                        |                                  |                 |             |                        |             |
|------------------------|----------------------------------|-----------------|-------------|------------------------|-------------|
| Acquisition Time (sec) | 4.9999                           | Date            | Nov 16 2021 | Date Stamp             | Nov 16 2021 |
| File Name              | d:\Users\Michal\Desktop\MW-6.fid | Frequency (MHz) | 399.91      | Nucleus                | 1H          |
| Original Points Count  | 32216                            | Points Count    | 32768       | Pulse Sequence         | s2pul       |
| Spectrum Offset (Hz)   | 2855.0256                        | Spectrum Type   | STANDARD    | Receiver Gain          | 56.00       |
|                        |                                  |                 |             | Sweep Width (Hz)       | 6443.30     |
|                        |                                  |                 |             | Temperature (degree C) | 25.000      |

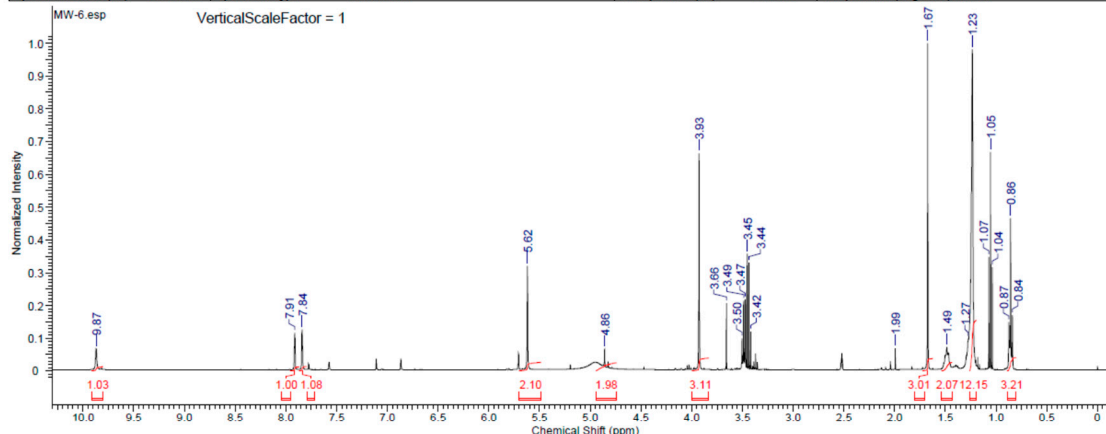

This report was created by ACD/NMR Processor Academic Edition. For more information go to [www.acdlabs.com/nmrproc/](http://www.acdlabs.com/nmrproc/)

2021-11-17 18:45:55

|                        |                                      |                 |             |                        |             |
|------------------------|--------------------------------------|-----------------|-------------|------------------------|-------------|
| Acquisition Time (sec) | 1.0000                               | Date            | Nov 16 2021 | Date Stamp             | Nov 16 2021 |
| File Name              | d:\Users\Michal\Desktop\MW-6-C13.fid | Frequency (MHz) | 100.57      | Nucleus                | 13C         |
| Original Points Count  | 22322                                | Points Count    | 32768       | Pulse Sequence         | s2pul       |
| Spectrum Offset (Hz)   | 9722.9541                            | Spectrum Type   | STANDARD    | Receiver Gain          | 56.00       |
|                        |                                      |                 |             | Sweep Width (Hz)       | 22321.43    |
|                        |                                      |                 |             | Temperature (degree C) | 25.000      |

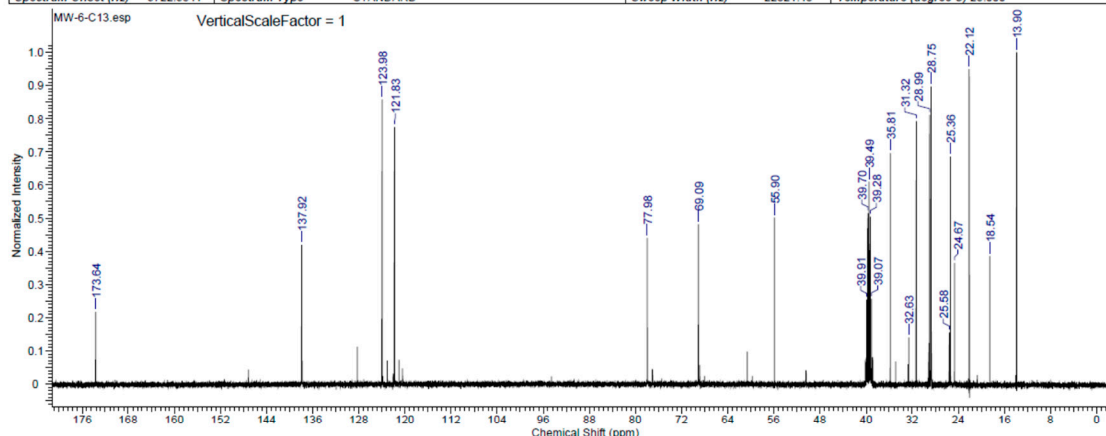

# 1-methyl-3-octyloxymethylimidazolium thymoloxycetate (TY-7):

This report was created by ACD/NMR Processor Academic Edition. For more information go to [www.acdlabs.com/nmrproc/](http://www.acdlabs.com/nmrproc/)

2021-11-17 18:45:07

|                        |                                  |                 |             |                  |                |                        |        |         |                     |
|------------------------|----------------------------------|-----------------|-------------|------------------|----------------|------------------------|--------|---------|---------------------|
| Acquisition Time (sec) | 4.9999                           | Date            | Nov 16 2021 | Date Stamp       | Nov 16 2021    |                        |        |         |                     |
| File Name              | d:\Users\Michal\Desktop\MW-7.fid | Frequency (MHz) | 399.91      | Nucleus          | <sup>1</sup> H | Number of Transients   | 64     |         |                     |
| Original Points Count  | 32216                            | Points Count    | 32768       | Pulse Sequence   | s2pul          | Receiver Gain          | 18.00  | Solvent | DMSO-d <sub>6</sub> |
| Spectrum Offset (Hz)   | 2851.3411                        | Spectrum Type   | STANDARD    | Sweep Width (Hz) | 6443.30        | Temperature (degree C) | 25.000 |         |                     |



| No. | (ppm) | (Hz)  | Height | No. | (ppm) | (Hz)   | Height | No. | (ppm) | (Hz)   | Height | No. | (ppm) | (Hz)   | Height | No. | (ppm) | (Hz)   | Height |
|-----|-------|-------|--------|-----|-------|--------|--------|-----|-------|--------|--------|-----|-------|--------|--------|-----|-------|--------|--------|
| 1   | 0.84  | 334.1 | 0.1511 | 9   | 1.15  | 461.3  | 0.0754 | 17  | 3.43  | 1373.1 | 0.1064 | 25  | 4.16  | 1664.7 | 0.5165 | 33  | 7.83  | 3131.8 | 0.1557 |
| 2   | 0.85  | 341.1 | 0.4144 | 10  | 1.17  | 468.2  | 0.0741 | 18  | 3.44  | 1376.8 | 0.0919 | 26  | 5.57  | 2229.5 | 0.3860 | 34  | 7.84  | 3133.6 | 0.1084 |
| 3   | 0.87  | 347.8 | 0.1293 | 11  | 1.22  | 486.6  | 0.6108 | 19  | 3.45  | 1379.6 | 0.2166 | 27  | 6.59  | 2634.2 | 0.2342 | 35  | 7.90  | 3157.8 | 0.1039 |
| 4   | 1.04  | 416.6 | 0.0844 | 12  | 1.24  | 495.9  | 0.2981 | 20  | 3.46  | 1383.7 | 0.0936 | 28  | 6.61  | 2642.0 | 0.0979 | 36  | 7.90  | 3159.6 | 0.1564 |
| 5   | 1.06  | 423.7 | 0.1646 | 13  | 1.27  | 506.9  | 0.0706 | 21  | 3.47  | 1386.3 | 0.0990 | 29  | 6.61  | 2643.6 | 0.0744 | 37  | 7.91  | 3161.3 | 0.0939 |
| 6   | 1.08  | 430.6 | 0.0864 | 14  | 1.46  | 582.4  | 0.0638 | 22  | 3.64  | 1457.7 | 0.1018 | 30  | 6.94  | 2775.5 | 0.1077 | 38  | 9.90  | 3960.9 | 0.1108 |
| 7   | 1.12  | 449.9 | 0.9842 | 15  | 2.09  | 833.9  | 0.6394 | 23  | 3.87  | 1546.3 | 0.6631 | 31  | 6.96  | 2783.0 | 0.0981 |     |       |        |        |
| 8   | 1.14  | 456.8 | 1.0000 | 16  | 2.74  | 1094.1 | 0.0688 | 24  | 3.89  | 1556.8 | 0.0823 | 32  | 7.83  | 3130.3 | 0.0850 |     |       |        |        |

This report was created by ACD/NMR Processor Academic Edition. For more information go to [www.acdlabs.com/nmrproc/](http://www.acdlabs.com/nmrproc/)

2021-11-17 18:46:37

|                        |                                      |                 |             |                  |                 |                        |        |         |                     |
|------------------------|--------------------------------------|-----------------|-------------|------------------|-----------------|------------------------|--------|---------|---------------------|
| Acquisition Time (sec) | 1.0000                               | Date            | Nov 16 2021 | Date Stamp       | Nov 16 2021     |                        |        |         |                     |
| File Name              | d:\Users\Michal\Desktop\MW-7-C13.fid | Frequency (MHz) | 100.57      | Nucleus          | <sup>13</sup> C | Number of Transients   | 1008   |         |                     |
| Original Points Count  | 22322                                | Points Count    | 32768       | Pulse Sequence   | s2pul           | Receiver Gain          | 56.00  | Solvent | DMSO-d <sub>6</sub> |
| Spectrum Offset (Hz)   | 9724.6572                            | Spectrum Type   | STANDARD    | Sweep Width (Hz) | 22321.43        | Temperature (degree C) | 25.000 |         |                     |



| No. | (ppm) | (Hz)   | Height | No. | (ppm) | (Hz)   | Height | No. | (ppm) | (Hz)   | Height | No. | (ppm)  | (Hz)    | Height | No. | (ppm)  | (Hz)    | Height |
|-----|-------|--------|--------|-----|-------|--------|--------|-----|-------|--------|--------|-----|--------|---------|--------|-----|--------|---------|--------|
| 1   | 13.95 | 1403.3 | 0.5618 | 8   | 28.80 | 2896.5 | 0.5766 | 15  | 35.72 | 3592.7 | 0.2018 | 22  | 69.08  | 6947.0  | 0.3803 | 29  | 129.68 | 13041.8 | 0.7141 |
| 2   | 15.92 | 1600.8 | 0.4479 | 9   | 29.03 | 2919.0 | 0.6370 | 16  | 39.08 | 3930.6 | 0.3067 | 23  | 77.93  | 7836.7  | 0.1992 | 30  | 137.99 | 13877.0 | 0.2086 |
| 3   | 22.16 | 2228.9 | 0.7792 | 10  | 29.05 | 2921.7 | 0.5702 | 17  | 39.29 | 3951.0 | 0.6166 | 24  | 109.72 | 11033.6 | 0.3799 | 31  | 138.01 | 13879.1 | 0.1905 |
| 4   | 23.96 | 2409.4 | 1.0000 | 11  | 29.09 | 2925.1 | 0.1791 | 18  | 39.50 | 3972.1 | 0.7230 | 25  | 116.52 | 11717.6 | 0.4993 | 32  | 146.76 | 14759.2 | 0.7368 |
| 5   | 25.40 | 2554.5 | 0.5543 | 12  | 31.36 | 3153.3 | 0.6020 | 19  | 39.71 | 3993.2 | 0.6162 | 26  | 121.87 | 12256.4 | 0.3920 | 33  | 157.18 | 15806.9 | 0.3249 |
| 6   | 28.74 | 2890.4 | 0.5044 | 13  | 33.51 | 3369.9 | 0.9856 | 20  | 39.92 | 4014.4 | 0.3142 | 27  | 122.61 | 12330.0 | 0.6841 | 34  | 170.61 | 17157.8 | 0.4107 |
| 7   | 28.77 | 2893.8 | 0.7299 | 14  | 35.70 | 3590.6 | 0.2819 | 21  | 68.08 | 6846.2 | 0.2637 | 28  | 123.99 | 12469.6 | 0.4364 |     |        |         |        |

# 1-methyl-3-octyloxymethylimidazolium vanillin oxyacetate (VA-8):

This report was created by ACD/NMR Processor Academic Edition. For more information go to [www.acdlabs.com/nmrproc/](http://www.acdlabs.com/nmrproc/)

2021-11-19 17:11:30

|                        |                                  |                 |             |                        |             |
|------------------------|----------------------------------|-----------------|-------------|------------------------|-------------|
| Acquisition Time (sec) | 3.9999                           | Date            | Nov 17 2021 | Date Stamp             | Nov 17 2021 |
| File Name              | d:\Users\Michal\Desktop\MW-8.fid | Frequency (MHz) | 399.91      | Nucleus                | 1H          |
| Original Points Count  | 24752                            | Points Count    | 32768       | Pulse Sequence         | s2pul       |
| Spectrum Offset (Hz)   | 2746.2166                        | Spectrum Type   | STANDARD    | Sweep Width (Hz)       | 6188.12     |
|                        |                                  |                 |             | Receiver Gain          | 20.00       |
|                        |                                  |                 |             | Solvent                | DMSO-d6     |
|                        |                                  |                 |             | Temperature (degree C) | 25.000      |

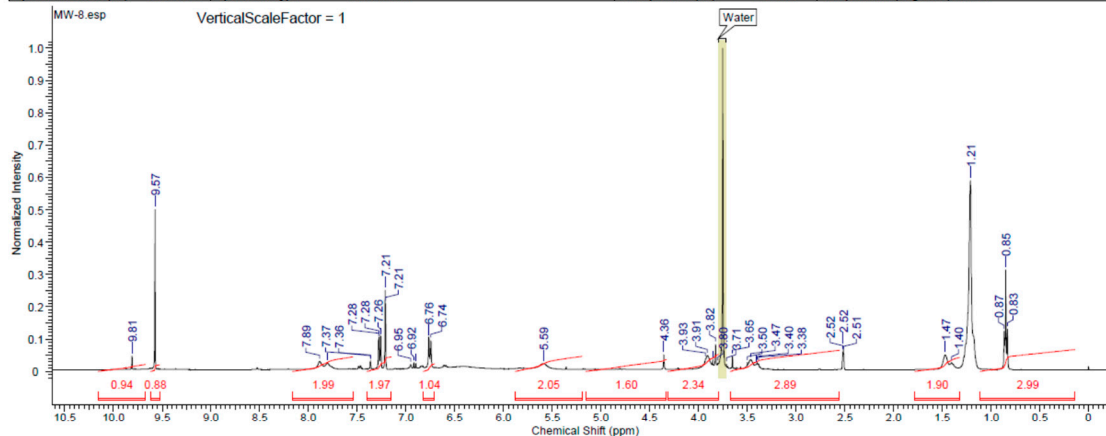

| No. | (ppm)          | Annotation | Layer No. | Created By | Created At             | Modified By | Modified At |
|-----|----------------|------------|-----------|------------|------------------------|-------------|-------------|
| 1   | [3.72 .. 3.80] | Water      | 1         | Michal     | Pt 2021-11-19 15:40:36 |             |             |

  

| No. | (ppm) | (Hz)   | Height |
|-----|-------|--------|--------|-----|-------|--------|--------|-----|-------|--------|--------|-----|-------|--------|--------|-----|-------|--------|--------|
| 1   | 0.83  | 333.0  | 0.1307 | 9   | 2.52  | 1008.1 | 0.0609 | 17  | 3.80  | 1520.1 | 0.0258 | 25  | 6.76  | 2705.3 | 0.1028 | 33  | 7.28  | 2909.9 | 0.1065 |
| 2   | 0.85  | 340.0  | 0.3145 | 10  | 3.38  | 1353.0 | 0.0255 | 18  | 3.82  | 1529.5 | 0.0845 | 26  | 6.90  | 2759.0 | 0.0239 | 34  | 7.28  | 2911.7 | 0.0990 |
| 3   | 0.87  | 346.4  | 0.1240 | 11  | 3.40  | 1359.4 | 0.0271 | 19  | 3.86  | 1541.8 | 0.0339 | 27  | 6.92  | 2767.3 | 0.0254 | 35  | 7.36  | 2944.0 | 0.0301 |
| 4   | 1.21  | 484.4  | 0.5908 | 12  | 3.41  | 1364.9 | 0.0211 | 20  | 3.91  | 1563.5 | 0.0491 | 28  | 6.95  | 2780.1 | 0.0209 | 36  | 7.37  | 2945.7 | 0.0316 |
| 5   | 1.40  | 561.7  | 0.0259 | 13  | 3.47  | 1385.8 | 0.0362 | 21  | 3.93  | 1570.9 | 0.0387 | 29  | 7.21  | 2882.9 | 0.2103 | 37  | 7.80  | 3121.2 | 0.0259 |
| 6   | 1.47  | 587.9  | 0.0511 | 14  | 3.50  | 1399.4 | 0.0267 | 22  | 4.36  | 1741.6 | 0.0510 | 30  | 7.21  | 2884.7 | 0.2519 | 38  | 7.89  | 3153.3 | 0.0312 |
| 7   | 2.51  | 1004.5 | 0.0583 | 15  | 3.65  | 1460.2 | 0.0471 | 23  | 5.59  | 2236.4 | 0.0246 | 31  | 7.26  | 2901.7 | 0.1101 | 39  | 9.57  | 3828.4 | 0.5014 |
| 8   | 2.52  | 1006.2 | 0.0783 | 16  | 3.71  | 1485.2 | 0.0230 | 24  | 6.74  | 2697.2 | 0.0956 | 32  | 7.26  | 2903.6 | 0.1058 | 40  | 9.81  | 3922.7 | 0.0479 |

This report was created by ACD/NMR Processor Academic Edition. For more information go to [www.acdlabs.com/nmrproc/](http://www.acdlabs.com/nmrproc/)

2021-11-19 17:11:05

|                        |                                      |                 |             |                        |             |
|------------------------|--------------------------------------|-----------------|-------------|------------------------|-------------|
| Acquisition Time (sec) | 1.1000                               | Date            | Nov 17 2021 | Date Stamp             | Nov 17 2021 |
| File Name              | d:\Users\Michal\Desktop\MW-8-C13.fid | Frequency (MHz) | 100.57      | Nucleus                | 13C         |
| Original Points Count  | 24554                                | Points Count    | 32768       | Pulse Sequence         | s2pul       |
| Spectrum Offset (Hz)   | 9725.3379                            | Spectrum Type   | STANDARD    | Sweep Width (Hz)       | 22321.43    |
|                        |                                      |                 |             | Receiver Gain          | 60.00       |
|                        |                                      |                 |             | Solvent                | DMSO-d6     |
|                        |                                      |                 |             | Temperature (degree C) | 25.000      |

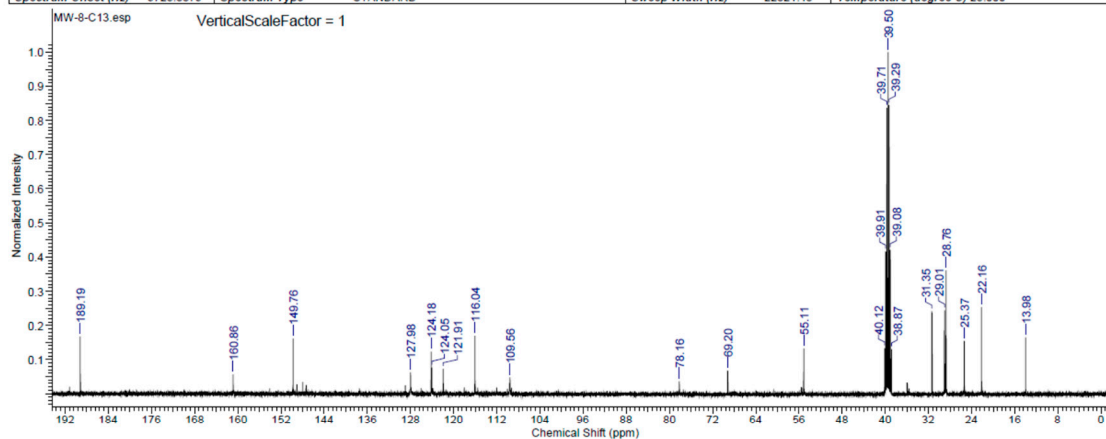

| No. | (ppm) | (Hz)   | Height | No. | (ppm) | (Hz)   | Height | No. | (ppm) | (Hz)   | Height | No. | (ppm)  | (Hz)    | Height | No. | (ppm)  | (Hz)    | Height |
|-----|-------|--------|--------|-----|-------|--------|--------|-----|-------|--------|--------|-----|--------|---------|--------|-----|--------|---------|--------|
| 1   | 13.98 | 1406.0 | 0.1644 | 7   | 29.04 | 2920.3 | 0.1842 | 13  | 39.71 | 3993.2 | 0.8377 | 19  | 109.56 | 11017.9 | 0.0471 | 25  | 149.76 | 15060.3 | 0.1617 |
| 2   | 22.16 | 2228.2 | 0.2535 | 8   | 31.35 | 3152.6 | 0.2411 | 14  | 39.91 | 4013.7 | 0.4165 | 20  | 116.04 | 11669.9 | 0.1695 | 26  | 160.86 | 16177.5 | 0.0561 |
| 3   | 25.37 | 2551.8 | 0.1544 | 9   | 38.87 | 3908.8 | 0.1305 | 15  | 40.12 | 4034.8 | 0.1333 | 21  | 121.91 | 12259.8 | 0.0725 | 27  | 189.19 | 19026.3 | 0.1671 |
| 4   | 28.70 | 2886.3 | 0.1617 | 10  | 39.08 | 3929.9 | 0.4208 | 16  | 55.11 | 5542.3 | 0.1317 | 22  | 124.05 | 12475.1 | 0.0762 |     |        |         |        |
| 5   | 28.76 | 2892.4 | 0.3615 | 11  | 39.29 | 3951.0 | 0.8443 | 17  | 69.20 | 6959.3 | 0.0672 | 23  | 124.18 | 12488.0 | 0.1228 |     |        |         |        |
| 6   | 29.01 | 2917.6 | 0.2439 | 12  | 39.50 | 3972.1 | 1.0000 | 18  | 78.16 | 7860.5 | 0.0366 | 24  | 127.98 | 12870.9 | 0.0628 |     |        |         |        |

# 1-methyl-3-octyloxymethylimidazolium eugenoloxycetate (EV-9):

This report was created by ACD/NMR Processor Academic Edition. For more information go to [www.acdlabs.com/nmrproc/](http://www.acdlabs.com/nmrproc/)

2021-11-19 17:09:52

|                        |                                     |                 |             |                        |                |
|------------------------|-------------------------------------|-----------------|-------------|------------------------|----------------|
| Acquisition Time (sec) | 5.0001                              | Date            | Nov 17 2021 | Date Stamp             | Nov 17 2021    |
| File Name              | d:\Users\Michal\Desktop\MW-9.fidfid | Frequency (MHz) | 399.91      | Nucleus                | <sup>1</sup> H |
| Original Points Count  | 30941                               | Points Count    | 32768       | Pulse Sequence         | s2pul          |
| Spectrum Offset (Hz)   | 2744.8352                           | Spectrum Type   | STANDARD    | Receiver Gain          | 18.00          |
|                        |                                     |                 |             | Sweep Width (Hz)       | 6188.12        |
|                        |                                     |                 |             | Temperature (degree C) | 25.000         |

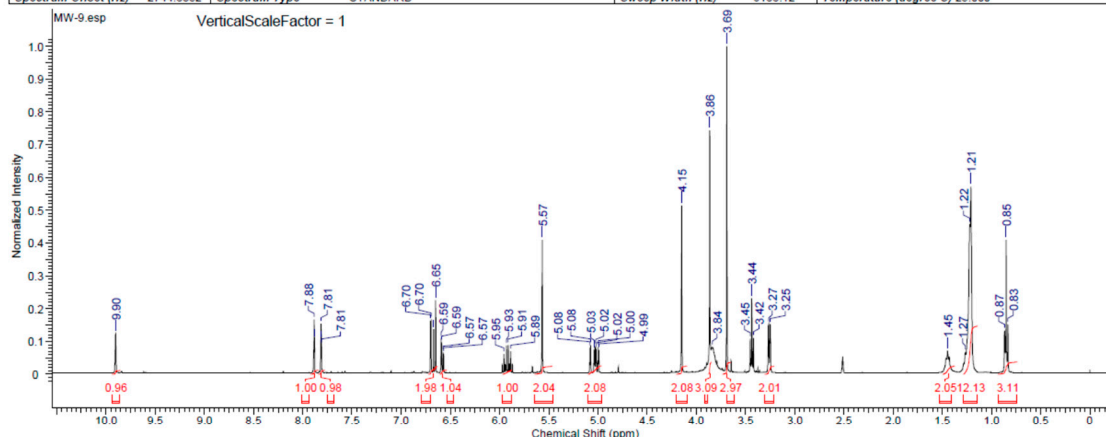

This report was created by ACD/NMR Processor Academic Edition. For more information go to [www.acdlabs.com/nmrproc/](http://www.acdlabs.com/nmrproc/)

2021-11-19 17:10:29

|                        |                                         |                 |             |                        |                 |
|------------------------|-----------------------------------------|-----------------|-------------|------------------------|-----------------|
| Acquisition Time (sec) | 1.1000                                  | Date            | Nov 17 2021 | Date Stamp             | Nov 17 2021     |
| File Name              | d:\Users\Michal\Desktop\MW-9-C13.fidfid | Frequency (MHz) | 100.57      | Nucleus                | <sup>13</sup> C |
| Original Points Count  | 24554                                   | Points Count    | 32768       | Pulse Sequence         | s2pul           |
| Spectrum Offset (Hz)   | 9724.6572                               | Spectrum Type   | STANDARD    | Receiver Gain          | 56.00           |
|                        |                                         |                 |             | Sweep Width (Hz)       | 22321.43        |
|                        |                                         |                 |             | Temperature (degree C) | 25.000          |

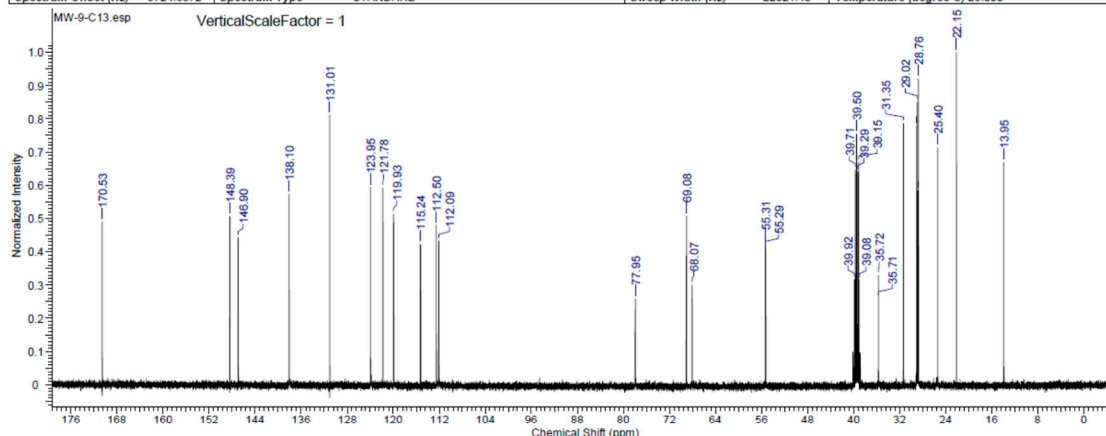



# 1-methyl-3-octyloxymethylimidazolium trimethylacetate (TR-10):

This report was created by ACD/NMR Processor Academic Edition. For more information go to [www.acdlabs.com/nmrproc/](http://www.acdlabs.com/nmrproc/)

2021-11-17 18:45:29

|                        |                                   |                 |             |                  |             |                        |        |         |         |
|------------------------|-----------------------------------|-----------------|-------------|------------------|-------------|------------------------|--------|---------|---------|
| Acquisition Time (sec) | 4.9999                            | Date            | Nov 17 2021 | Date Stamp       | Nov 17 2021 |                        |        |         |         |
| File Name              | d:\Users\Michal\Desktop\MW-10.fid | Frequency (MHz) | 399.91      | Nucleus          | 1H          | Number of Transients   | 64     |         |         |
| Original Points Count  | 32216                             | Points Count    | 32768       | Pulse Sequence   | s2pul       | Receiver Gain          | 16.00  | Solvent | DMSO-d6 |
| Spectrum Offset (Hz)   | 2856.6477                         | Spectrum Type   | STANDARD    | Sweep Width (Hz) | 6443.30     | Temperature (degree C) | 25.000 |         |         |

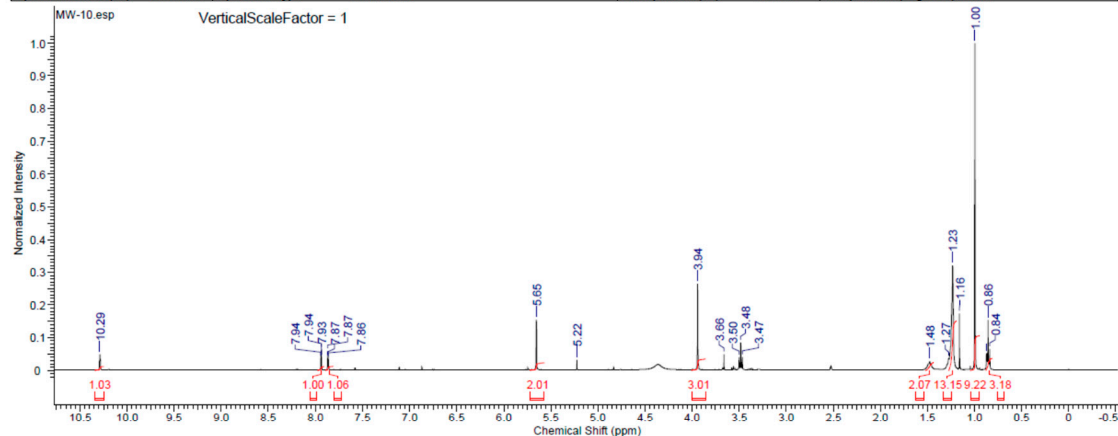

This report was created by ACD/NMR Processor Academic Edition. For more information go to [www.acdlabs.com/nmrproc/](http://www.acdlabs.com/nmrproc/)

2021-11-17 18:47:04

|                        |                                       |                 |             |                  |             |                        |        |         |         |
|------------------------|---------------------------------------|-----------------|-------------|------------------|-------------|------------------------|--------|---------|---------|
| Acquisition Time (sec) | 1.1000                                | Date            | Nov 17 2021 | Date Stamp       | Nov 17 2021 |                        |        |         |         |
| File Name              | d:\Users\Michal\Desktop\MW-10-C13.fid | Frequency (MHz) | 100.57      | Nucleus          | 13C         | Number of Transients   | 784    |         |         |
| Original Points Count  | 24554                                 | Points Count    | 32768       | Pulse Sequence   | s2pul       | Receiver Gain          | 56.00  | Solvent | DMSO-d6 |
| Spectrum Offset (Hz)   | 9726.3604                             | Spectrum Type   | STANDARD    | Sweep Width (Hz) | 22321.43    | Temperature (degree C) | 25.000 |         |         |

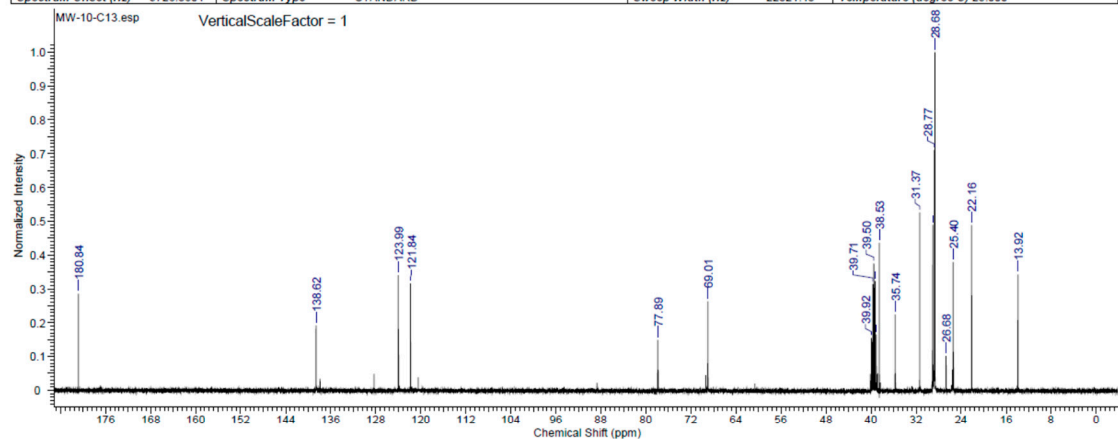

Supplement: s1 [file s1]
